# Supplementary material for: Combinatorial Assembly of Small Molecules into Bivalent Antagonists of TrkC or TrkA Receptors
Source: PubMed Central journal article supplement (PMC3945644; doi:10.1371/journal.pone.0089617), 2014-03-06
Supplement: pone.0089617.s001.pdf [file pone.0089617.s001.pdf]

# SUPPORTING INFORMATION

## Combinatorial Assembly of Small Molecules into Bivalent Antagonists of TrkC or TrkA Receptors

Fouad Brahimi <sup>a,1</sup>, Eunhwa Ko <sup>b,1</sup>, Andrey Malakhov <sup>b</sup>, Kevin Burgess <sup>b</sup>, and H. Uri Saragovi <sup>a,c,d,\*</sup>

<sup>a</sup> Lady Davis Institute-Jewish General Hospital, Montreal, Quebec, Canada H3T 1E2

<sup>b</sup> Department of Chemistry, Texas A&M University, Texas, USA 77842.

<sup>c</sup> Department of Pharmacology and Therapeutics, McGill University, Montreal, Quebec, Canada H3T 1E2.

<sup>d</sup> Department of Oncology and the Cancer Center, McGill University, Montreal, Quebec, Canada H3T 1E2.

<sup>1</sup> equal first authors

\* corresponding author. H.U. Saragovi (uri.saragovi@mcgill.ca)

### TABLE OF CONTENTS

|           |                                                                                      |           |
|-----------|--------------------------------------------------------------------------------------|-----------|
| <b>A.</b> | <b>Table S1. <math>\beta</math>-Turn Sequence in Neurotrophins<sup>1</sup></b> ..... | <b>2</b>  |
| <b>B.</b> | <b>General Methods for Syntheses</b> .....                                           | <b>2</b>  |
| <b>C.</b> | <b>General Procedure and Preparation of Monovalent Mimics</b> .....                  | <b>3</b>  |
| <b>D.</b> | <b>General Procedure and Preparation of Bivalent Mimics</b> .....                    | <b>41</b> |
| <b>E.</b> | <b>Table S2. Characterization of Compounds with TEG-alkyne Label</b> .....           | <b>42</b> |
| <b>F.</b> | <b>Table S3. Characterization of Compounds with Biotin</b> .....                     | <b>46</b> |
| <b>G.</b> | <b>References</b> .....                                                              | <b>46</b> |

## A. Table S1. $\beta$ -Turn Sequence in Neurotrophins<sup>1</sup>

| protein | source     | $\beta$ -turn sequence |       |       |
|---------|------------|------------------------|-------|-------|
|         |            | 30-33                  | 44-47 | 93-96 |
| NGF     | murine     | DIKG                   | INNS  | DEKQ  |
|         | human      | DIKG                   | INNS  | DGKQ  |
|         | bovine     | DIKG                   | INNS  | DNKQ  |
|         | guinea pig | DIKG                   | VNNN  | DGKQ  |
| BDNF    | pig        | DMSG                   | VSKG  | DSKK  |
|         | human      | DMSG                   | VSKG  | DSKK  |
| NT-3    | mouse      | DIRG                   | KTGN  | ENNK  |
|         | human      | DIRG                   | KTGN  | ENNK  |

The side-chains of monovalent mimics were  $i+1$  and  $i+2$  residues in the  $\beta$ -turn sequences of neurotrophins from different sources. Red color residues were chosen for this research. NN and NK were excluded because of synthetic issue.

## B. General Methods for Syntheses

All reactions were carried out under an atmosphere of dry nitrogen. Glassware was oven-dried prior to use. Unless otherwise indicated, common reagents or materials were obtained from commercial source and used without further purification. All  $\alpha$ -amino acids used were of the L-configuration. Triethylamine (TEA) was obtained anhydrous by distillation over calcium hydride and tetrahydrofuran (THF) was distilled over sodium metal and benzophenone. Dichloromethane ( $\text{CH}_2\text{Cl}_2$ ) was dried by a Mbraun solvent drying system.

Flash column chromatography was performed using silica gel 60 (230-400 mesh). Analytical thin layer chromatography (TLC) was carried out on Merck silica gel plates with QF-254 indicator and visualized by UV.  $^1\text{H}$  and  $^{13}\text{C}$  NMR spectra were recorded on a Varian 500 (500 MHz  $^1\text{H}$ ; 125 MHz  $^{13}\text{C}$ ) spectrometer at room temperature. Chemical shifts were reported in ppm relative to the residual  $\text{CDCl}_3$  ( $\delta$  7.27 ppm  $^1\text{H}$ ;  $\delta$  77.0 ppm  $^{13}\text{C}$ ),  $\text{CD}_3\text{OD}$  ( $\delta$  3.31 ppm  $^1\text{H}$ ;  $\delta$  49.86 ppm  $^{13}\text{C}$ ), or  $d^6$ -DMSO ( $\delta$  2.49 ppm  $^1\text{H}$ ;  $\delta$  39.5 ppm  $^{13}\text{C}$ ). NMR chemical shifts were expressed in ppm relative to internal solvent peaks, and coupling constants were measured in Hz. (br = broad)

Analytical HPLC analyses were carried out on 150 x 4.6 mm C-18 column using gradient conditions (10 – 90% B, flow rate = 0.75 mL/min). Preparative HPLC was carried out on 100 x 21.2 mm C-18 column using gradient conditions (10 – 70% B, flow rate = 10.0 mL/min). The eluents used were: solvent A ( $\text{H}_2\text{O}$  with 0.1% TFA) and solvent B ( $\text{CH}_3\text{CN}$  with 0.1% TFA).

## C. General Procedure and Preparation of Monovalent Mimics

A total of 14 monovalent mimics were prepared by the following procedure in different sequence order of  $\beta$ -turn regions, e.g.  $i+1$  and  $i+2$  (TG) and  $i+2$  and  $i+1$  (GT).

**Scheme S1.** Syntheses of Monovalent Mimics

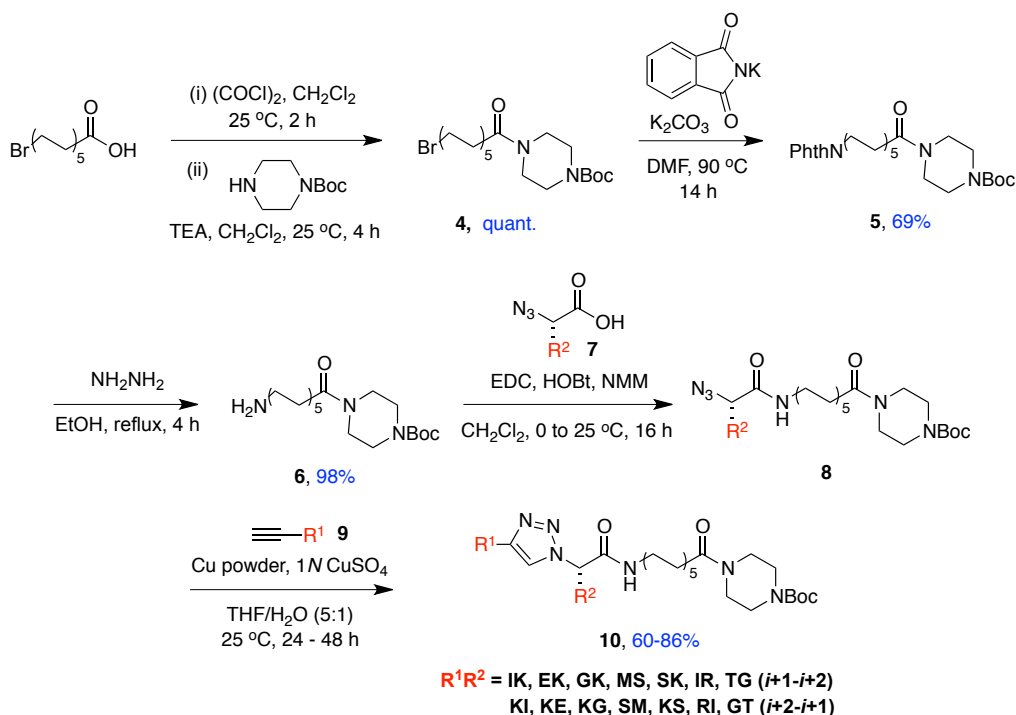

### General Procedure for Compound 5

To a solution of 11-bromoundecanoic acid (1.0 eq.) in  $\text{CH}_2\text{Cl}_2$  (1.0 M) was added oxalyl chloride (10.0 eq.). The mixture was stirred at  $25^\circ\text{C}$  for 2 h, and then the solvent was removed. To remove the excess oxalyl chloride, the resulting residue was dissolved in  $\text{CH}_2\text{Cl}_2$ , and the solvent was removed under vacuum (x2). The resulting residue was dissolved in  $\text{CH}_2\text{Cl}_2$  (1.0 M), and then Boc-piperazine (1.0 eq.), and TEA (2.5 eq.) were added to the solution. The mixture was stirred at  $25^\circ\text{C}$  for 4 h. After the solvent was removed under vacuum, the reaction mixture was diluted with  $\text{H}_2\text{O}$  and extracted with EtOAc (x3). The combined organic phases were washed with brine and then dried over  $\text{MgSO}_4$ . After completely removing the solvent, the compound **4** was purified by flash chromatography (1:3 EtOAc/Hexanes). To a solution of compound **4** (1.0 eq.) in DMF (0.09 M) was added  $\text{K}_2\text{CO}_3$  (1.05 eq.), and then the mixture was stirred at  $90^\circ\text{C}$  for 14 h. The reaction mixture was diluted with  $\text{H}_2\text{O}$  and extracted with EtOAc (x3). The combined organic phases were dried over  $\text{Na}_2\text{SO}_4$ . After completely removing the solvent, the compound **5** was purified by flash chromatography (2:5 EtOAc/Hexanes).

**Scheme S2.** Synthesis of Compound 5

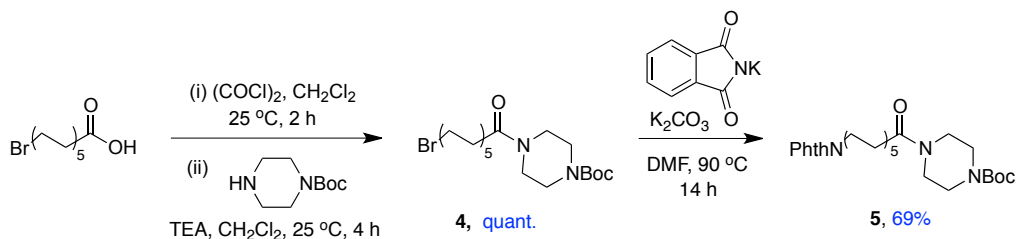

$^1\text{H}$  NMR (500 MHz,  $\text{DMSO-}d_6$ )  $\delta$  7.83-7.80 (m, 4H), 3.53 (t, 2H,  $J = 7.0$  Hz), 3.40-3.37 (m, 4H), 3.30-3.35 (m, 2H), 3.24 (br, 2H), 2.25 (t, 2H,  $J = 7.5$  Hz), 1.58-1.51 (m, 2H), 1.46-1.42 (m, 2H), 1.39 (s, 9H), 1.24-1.20 (m, 12H)

$^{13}\text{C}$  NMR (125 MHz,  $\text{DMSO-}d_6$ )  $\delta$  171.4, 168.6, 154.5, 135.0, 132.3, 123.7, 79.8, 45.3, 41.4, 38.0, 33.0, 29.6, 29.5(2), 29.4, 29.2, 28.7, 28.5, 26.9, 25.4

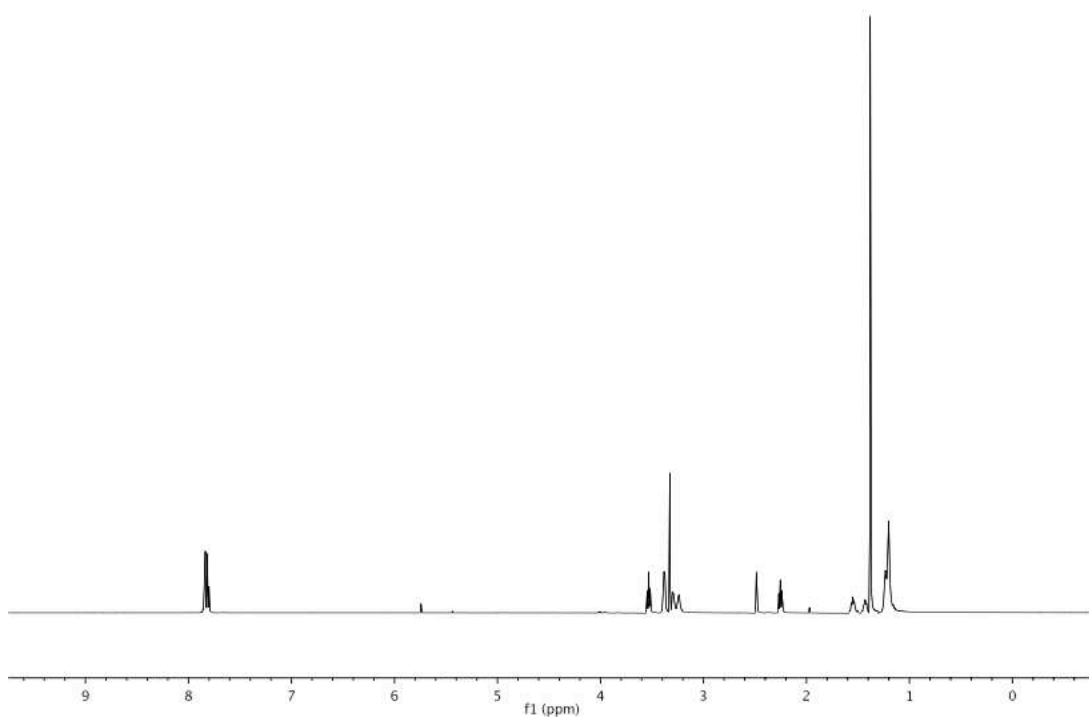

$^1\text{H}$  NMR of **5**

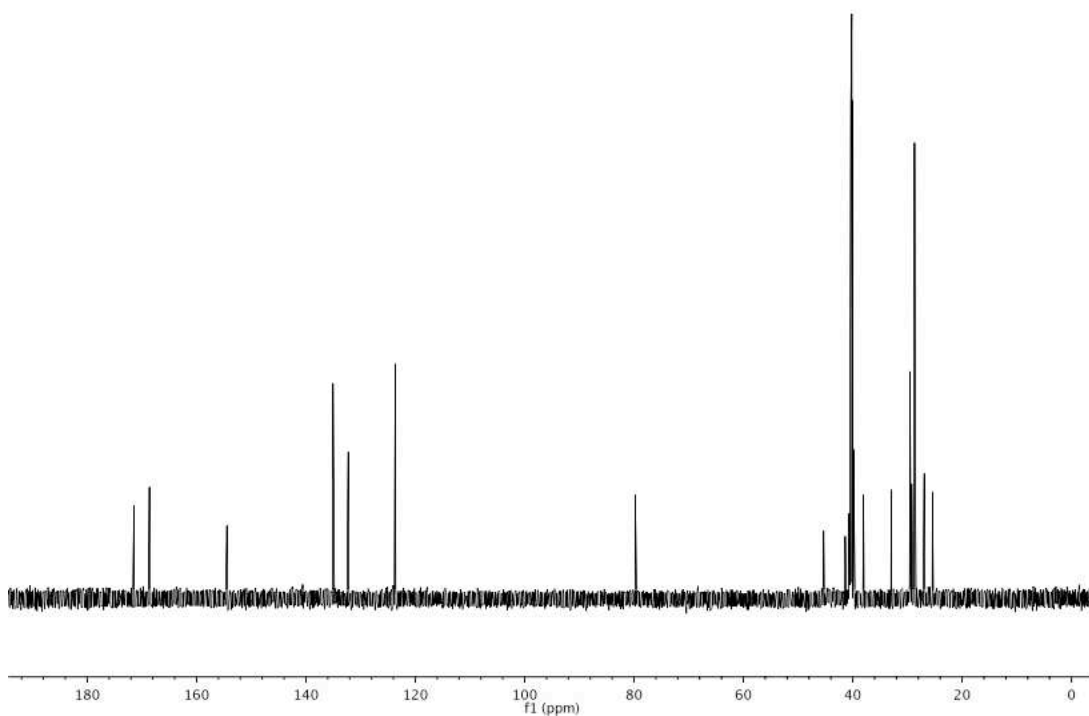

$^{13}\text{C}$  NMR of **5**

### General Procedure for Compound 6

Compound **5** (1.0 eq.) was dissolved in EtOH (0.16 M), and then hydrazine (4.0 eq.) was added to the solution. The mixture was refluxed at 90 °C for 4 h. After the reaction, the mixture was filtered, and then the solution was concentrated. Compound **6**, thus obtained, was used for the next step without further purification.

#### Scheme S3. Synthesis of Compound 6

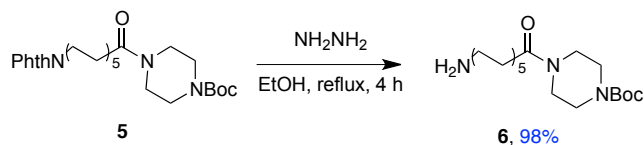

$^1\text{H}$  NMR (500 MHz, DMSO- $d_6$ )  $\delta$  3.40-3.38 (m, 4H), 3.30 (br, 2H), 3.24 (br, 2H), 2.48 (t, 2H,  $J = 5.5$  Hz), 2.27 (t, 2H,  $J = 7.5$  Hz), 1.45 (t, 2H,  $J = 6.0$  Hz), 1.39 (s, 9H), 1.30 (t, 2H,  $J = 6.0$  Hz), 1.22 (br, 12H)

$^{13}\text{C}$  NMR (125 MHz, DMSO- $d_6$ )  $\delta$  171.5, 154.5, 79.8, 45.3, 42.3, 41.4, 34.0, 33.0, 29.8, 29.7(2), 29.6, 29.5, 28.7, 27.1, 25.4

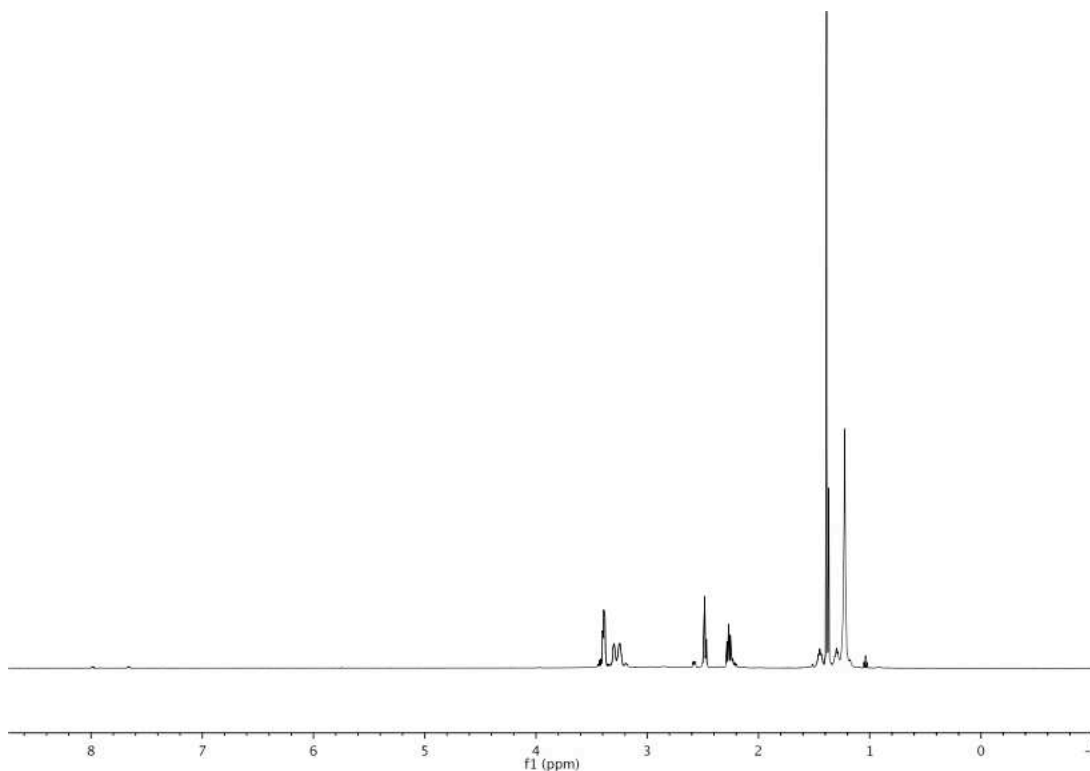

$^1\text{H}$  NMR of **6**

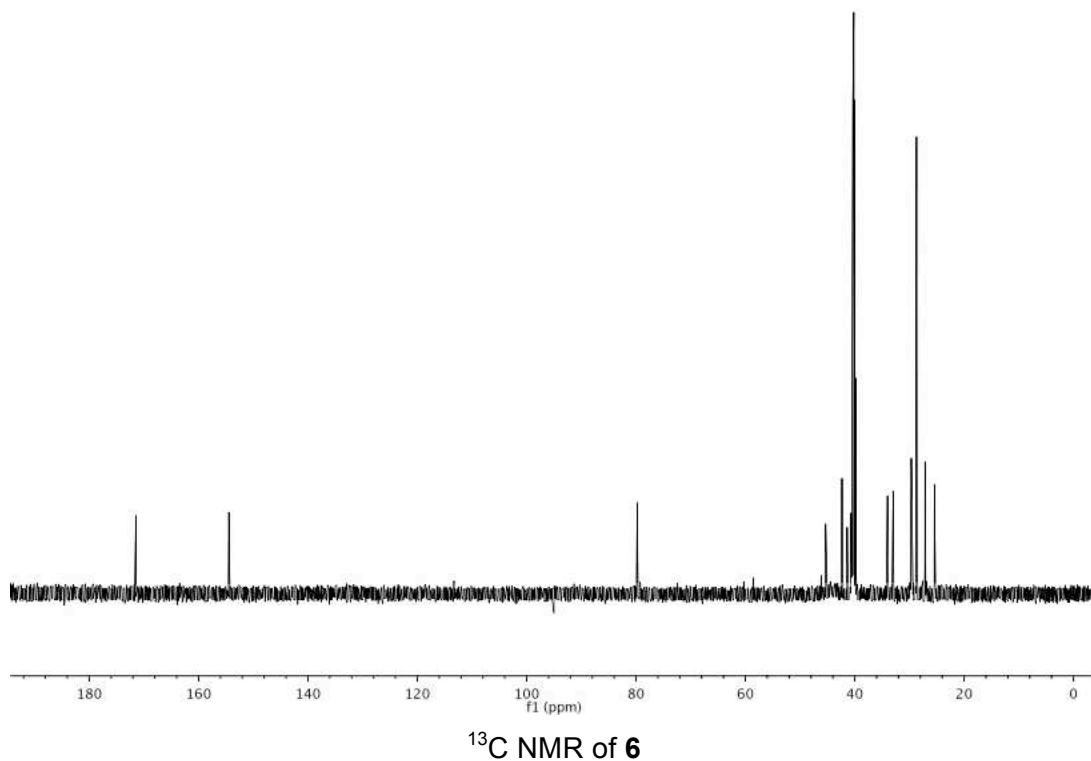

### General Procedure for Compounds **8**

HOBt (1.1 eq.) and EDCI (1.1 eq.) were added to the solution of azide **7** (1.0 eq.) in  $\text{CH}_2\text{Cl}_2$  (0.2 M) at 0 °C. The mixture was stirred at 0 °C for 15 min, and then NMM (2.0 eq.) and compound **6** (1.0 eq.) were added into the mixture. The solution was warmed up to 25 °C, and the mixture was stirred for 16 h. The solvent was removed, and then the resulting residue was diluted with  $\text{H}_2\text{O}$  and extracted with EtOAc (x3). The combined organic layer was washed with 5% HCl (aq.), followed by 5%  $\text{Na}_2\text{CO}_3$  (aq.), and brine, and then dried over  $\text{Na}_2\text{SO}_4$ . After completely removing the solvent, the compound **8** derivatives were purified by flash chromatography (EtOAc/Hexanes).

### Scheme S4. Synthesis of Compounds **8**

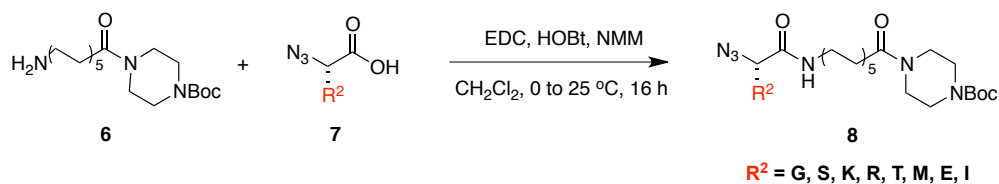

### Compound **8\_G**

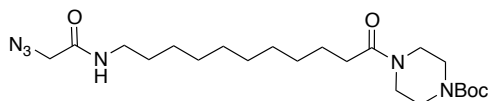

$^1\text{H}$  NMR (500 MHz,  $\text{CDCl}_3$ )  $\delta$  6.44 (br, 1H), 3.93 (s, 2H), 3.56-3.53 (m, 2H), 3.43-3.34 (m, 6H), 3.25 (td, 2H,  $J = 12.0$  Hz,  $J = 21.5$  Hz), 2.29 (t, 2H,  $J = 12.5$  Hz), 1.63-1.53 (m, 2H), 1.50-1.48 (m, 2H), 1.43 (s, 9H), 1.25 (br, 12H)

$^{13}\text{C}$  NMR (125 MHz,  $\text{CDCl}_3$ )  $\delta$  172.1, 166.7, 154.8, 80.5, 52.9, 45.6, 41.5, 39.7, 33.6, 29.6(3), 29.4(2), 29.3, 28.6, 27.0, 25.5

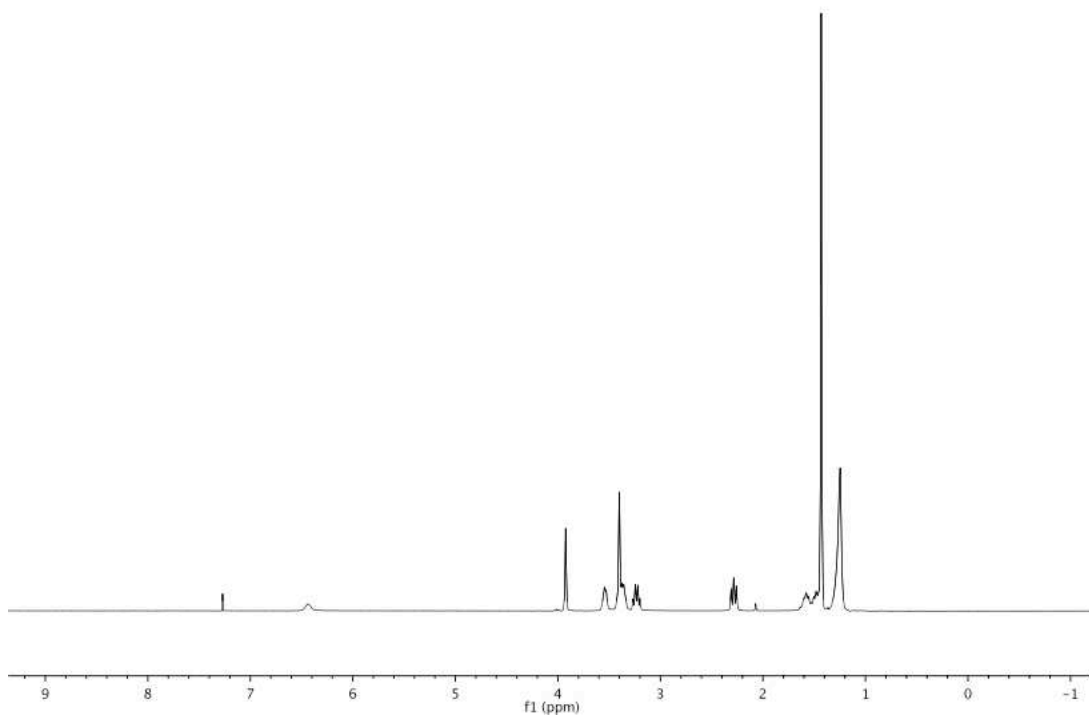

$^1\text{H}$  NMR of **8\_G**

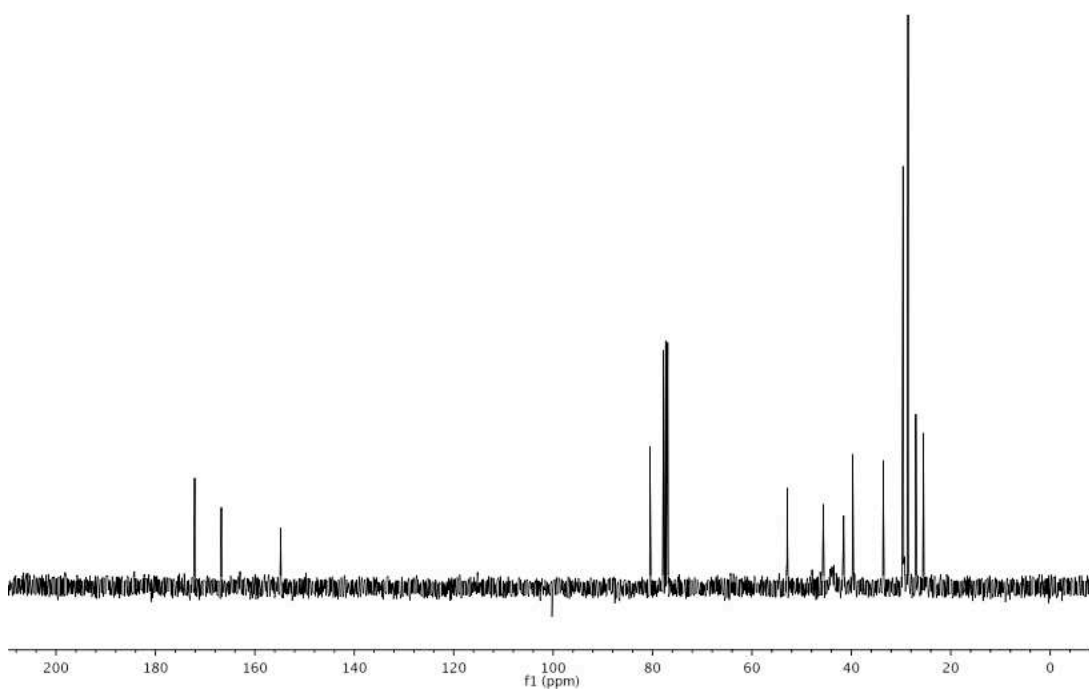

$^{13}\text{C}$  NMR of **8\_G**

## Compound 8\_S

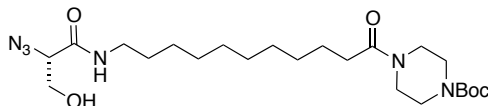

<sup>1</sup>H NMR (500 MHz, CDCl<sub>3</sub>) δ 6.56 (br, 1H), 4.08-4.01 (m, 1H), 3.97-3.91 (m, 1H), 3.60-3.56 (m, 2H), 3.43 (s, 4H), 3.41-3.37 (m, 2H), 3.33 (br, 1H), 3.28 (td, 2H, J = 9.5 Hz, J = 21.5 Hz), 2.31 (t, 2H, J = 14.5 Hz), 1.86 (br, 1H), 1.67-1.58 (m, 2H), 1.56-1.47 (m, 2H), 1.46 (s, 9H), 1.27 (br, 12H)

<sup>13</sup>C NMR (125 MHz, CDCl<sub>3</sub>) δ 172.3, 168.1, 154.8, 64.9, 63.6, 45.7, 41.6, 39.7, 33.6, 31.8, 29.6, 29.5(3), 29.4, 29.3, 28.6, 26.9, 25.4

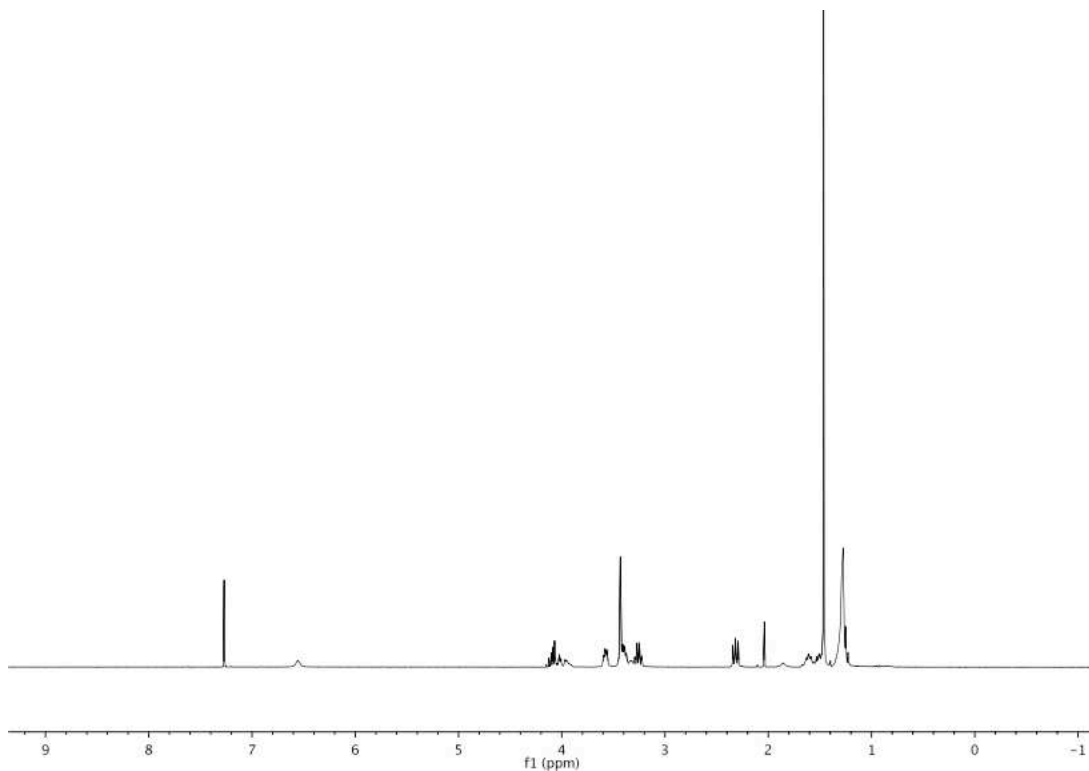

<sup>1</sup>H NMR of 8\_S



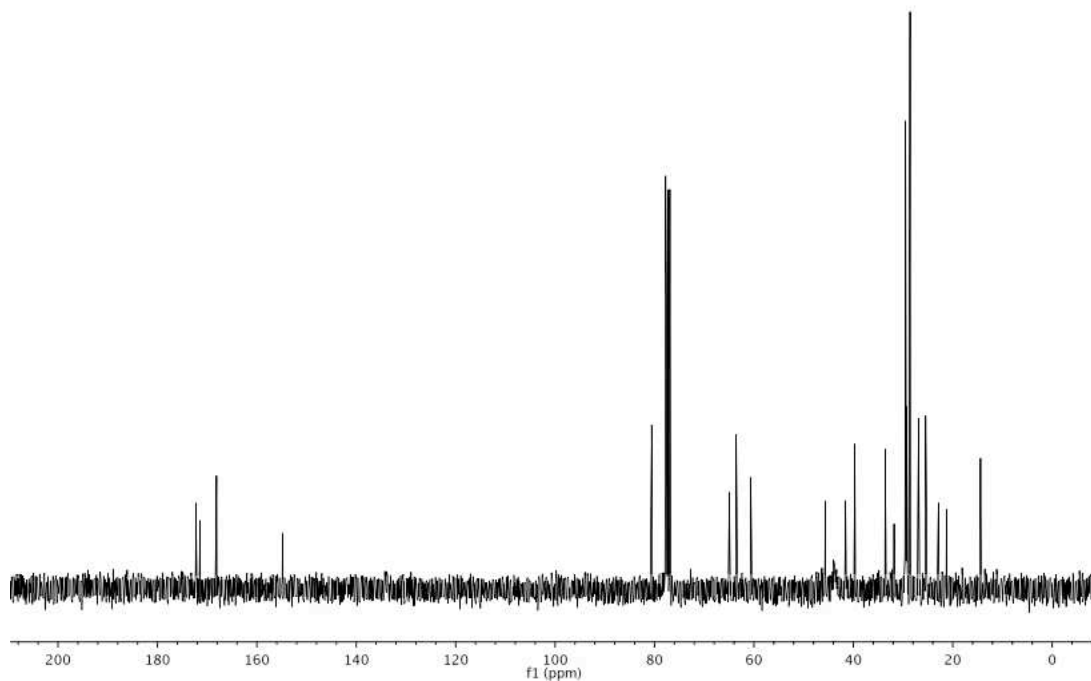 $^{13}\text{C}$  NMR of **8\_S****Compound 8\_K**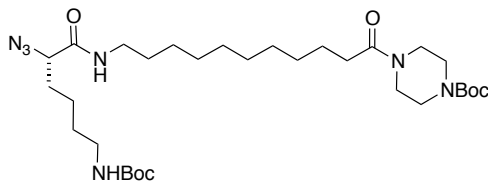

$^1\text{H}$  NMR (500 MHz,  $\text{CDCl}_3$ )  $\delta$  6.68 (t, 1H,  $J = 9.5$  Hz), 4.90 (t, 1H,  $J = 7.5$  Hz), 3.77-3.73 (m, 1H), 3.46-3.42 (m, 2H), 3.31 (s, 4H), 3.31-3.25 (m, 2H), 3.09 (td, 2H,  $J = 11.5$  Hz,  $J = 22.5$  Hz), 2.95 (td, 2H,  $J = 10.0$  Hz,  $J = 21.0$  Hz), 2.19 (t, 2H,  $J = 12.5$  Hz), 1.83-1.61 (m, 2H), 1.50-1.44 (m, 2H), 1.41-1.35 (m, 4H), 1.33 (s, 9H), 1.29 (s, 9H), 1.14 (br, 14H)

$^{13}\text{C}$  NMR (125 MHz,  $\text{CDCl}_3$ )  $\delta$  171.9, 169.4, 156.2, 154.6, 80.3, 78.9, 64.0, 45.5, 43.7, 41.4, 40.3, 39.6, 33.42, 31.8, 29.8, 29.5(2), 29.4, 29.3(2), 28.5, 28.4, 26.9, 25.4, 22.8

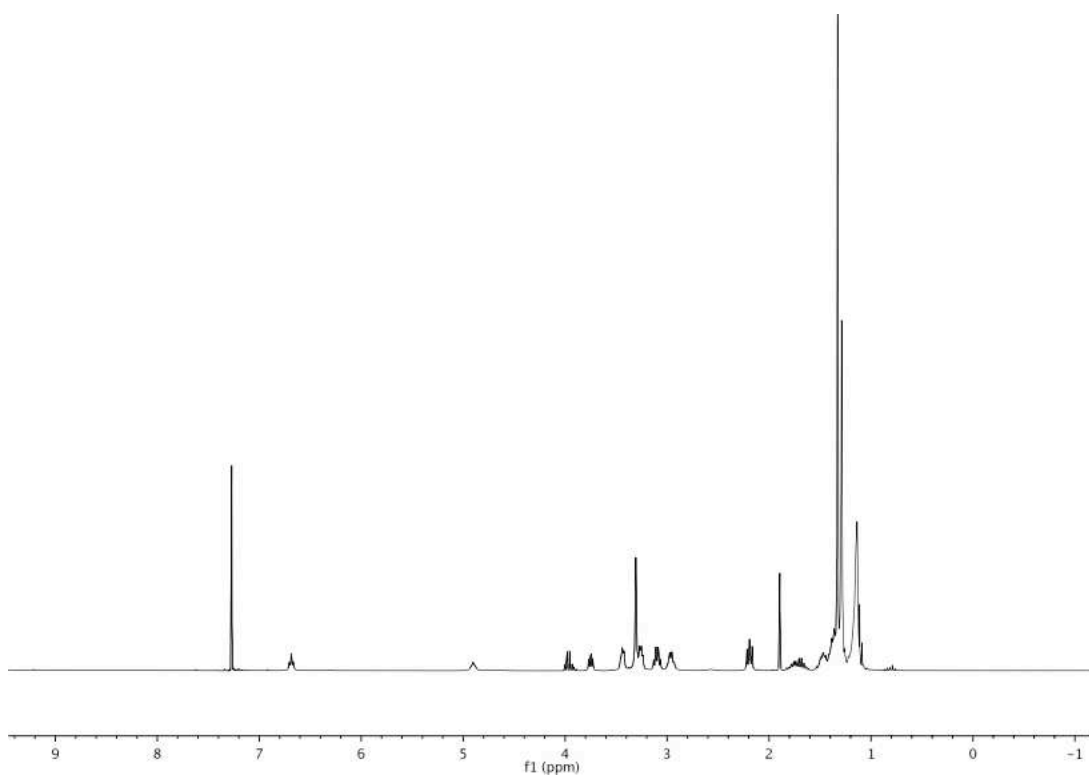 $^1\text{H}$  NMR of **8\_K**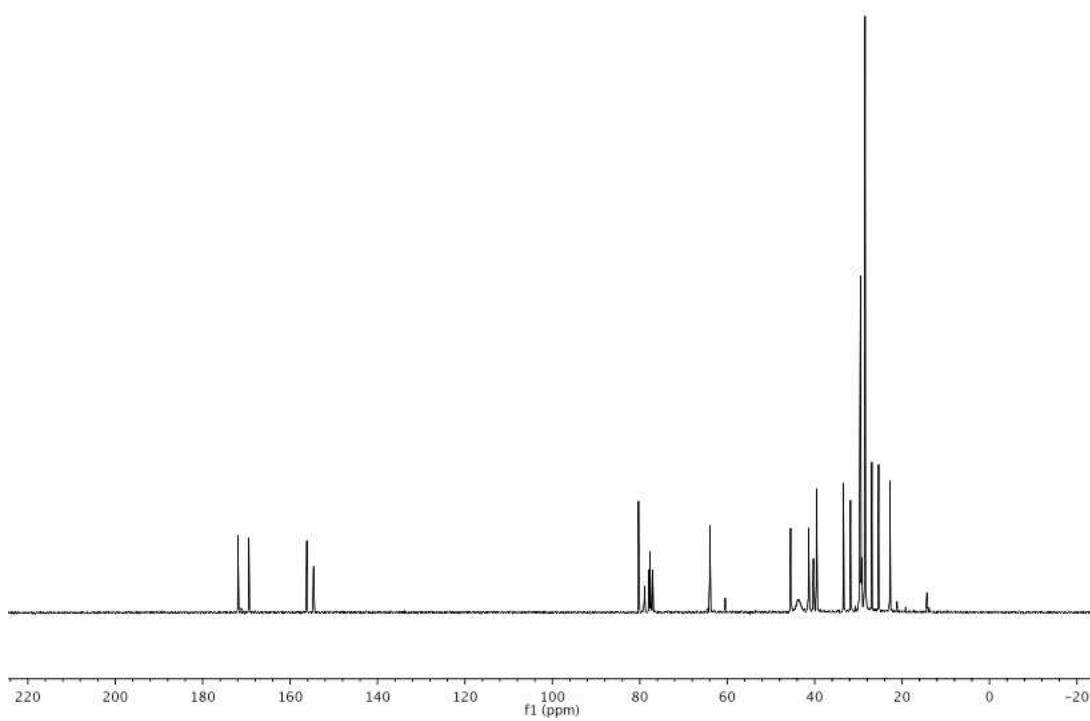 $^{13}\text{C}$  NMR of **8\_K**

## Compound 8\_R

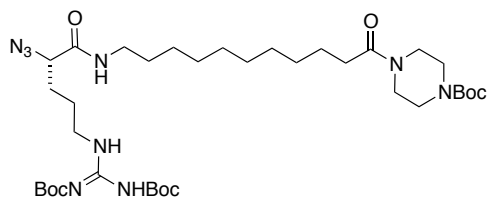

$^1\text{H}$  NMR (500 MHz,  $\text{CDCl}_3$ )  $\delta$  8.39 (t, 1H,  $J = 9.5$  Hz), 6.43 (t, 1H,  $J = 9.5$  Hz), 4.03 (t, 1H,  $J = 8.5$  Hz), 3.61-3.357 (m, 2H), 3.44 (s, 4H), 3.41-3.35 (m, 2H), 3.30-3.19 (m, 2H), 2.33 (t, 2H,  $J = 12.5$  Hz), 1.98-1.82 (m, 4H), 1.75-1.67 (m, 2H), 1.62-1.59 (m, 2H), 1.50 (s, 18H), 1.47 (s, 9H), 1.28 (br, 12H)

$^{13}\text{C}$  NMR (125 MHz,  $\text{CDCl}_3$ )  $\delta$  N.A.

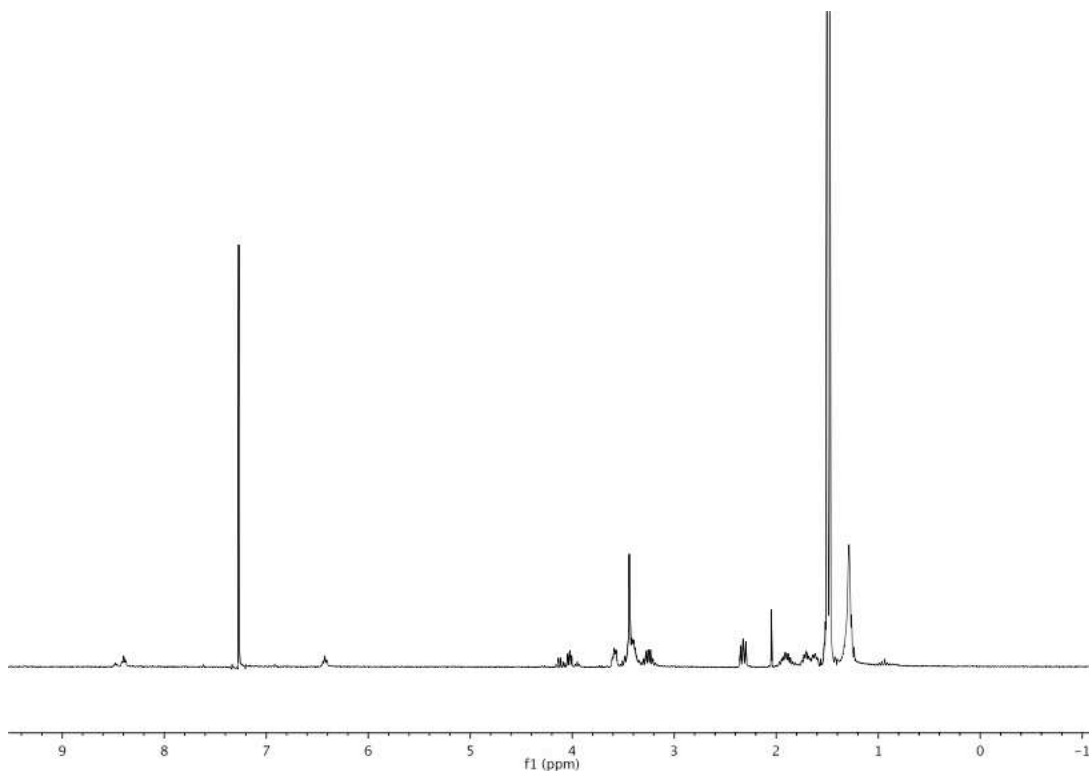

$^1\text{H}$  NMR of 8\_R

## Compound 8\_T

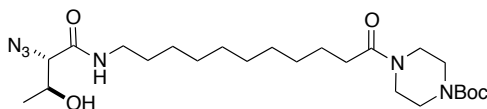

$^1\text{H}$  NMR (500 MHz,  $\text{DMSO}-d_6$ )  $\delta$  8.13 (t, 1H,  $J = 5.5$  Hz), 5.18 (d, 1H,  $J = 5.0$  Hz), 3.93-9.89 (m, 1H), 3.41-3.38 (m, 5H), 3.30 (br, 2H), 3.24 (br, 2H), 3.11-2.98 (m, 2H), 2.27 (t, 2H,  $J = 7.5$  Hz), 1.48-1.42 (m, 2H), 1.39-1.36 (m, 11H), 1.23 (br, 12H), 1.06 (d, 3H,  $J = 5.5$  Hz)

$^{13}\text{C}$  NMR (125 MHz,  $\text{DMSO}-d_6$ )  $\delta$  171.5, 168.6, 154.5, 79.8, 68.4, 67.6, 45.3, 33.0, 29.6(3), 29.5(2), 29.4, 29.3, 28.7, 27.0, 25.4, 20.9

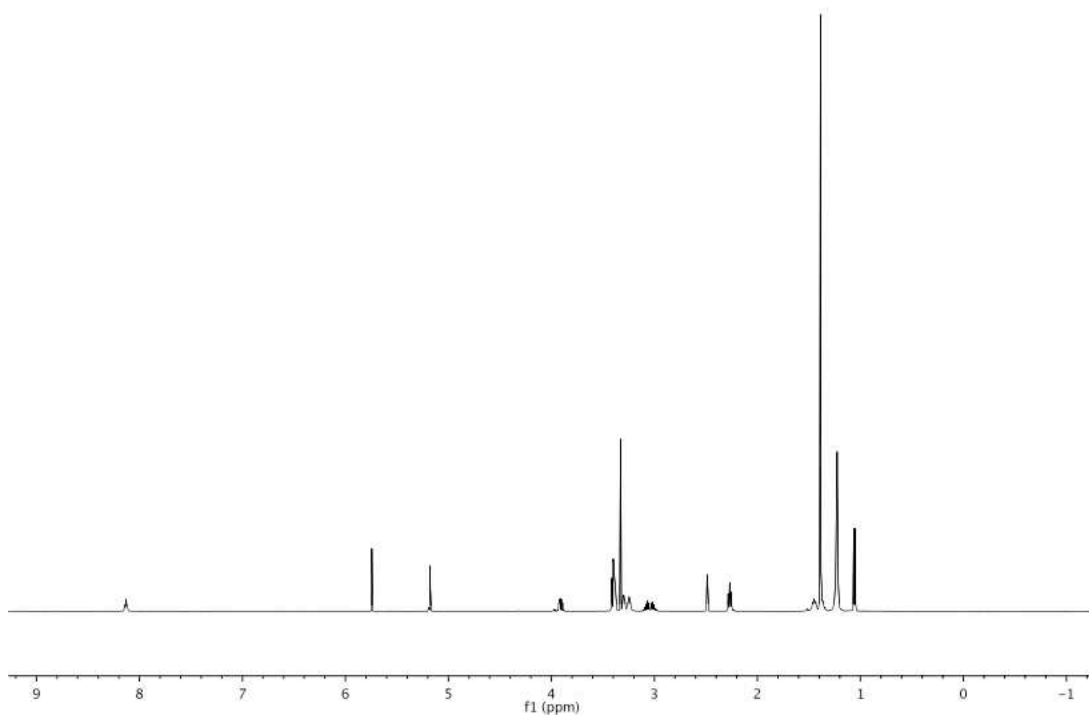 $^1\text{H}$  NMR of **8\_T**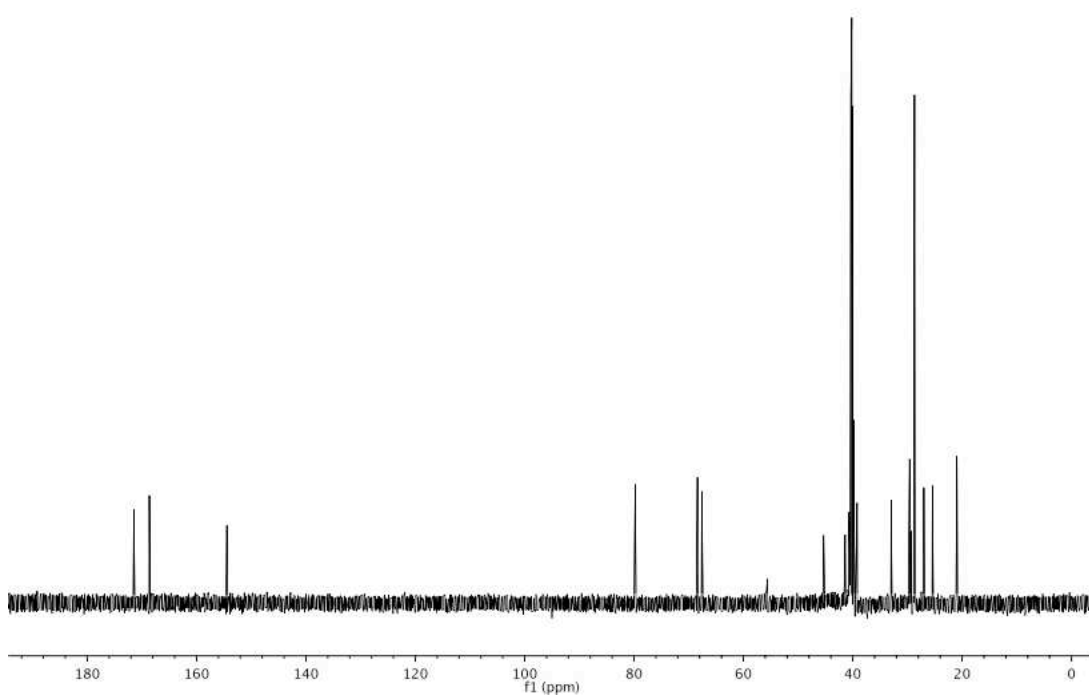 $^{13}\text{C}$  NMR of **8\_T**

## Compound 8\_M

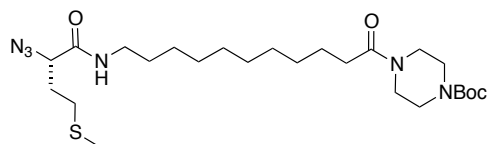

<sup>1</sup>H NMR (500 MHz, DMSO-*d*<sub>6</sub>) δ 8.22 (t, 1H, J = 5.5 Hz), 3.82 (dd, 1H, J = 6.0 Hz, J = 8.0 Hz), 3.40-3.38 (m, 4H), 3.31-3.29 (m, 2H), 3.24 (br, 2H), 3.11-3.01 (m, 2H), 2.48-2.41 (m, 2H), 2.27 (t, 2H, J = 7.5 Hz), 2.04 (s, 3H), 1.97-1.84 (m, 2H), 1.46-1.43 (m, 2H), 1.39 (s, 11H), 1.23 (br, 12H)

<sup>13</sup>C NMR (125 MHz, DMSO-*d*<sub>6</sub>) δ 171.5, 169.3, 154.5, 79.8, 61.3, 45.3, 41.4, 33.0, 31.4, 30.1, 29.7, 29.6(2), 29.5(2), 29.3, 28.7, 27.0, 25.4, 15.3

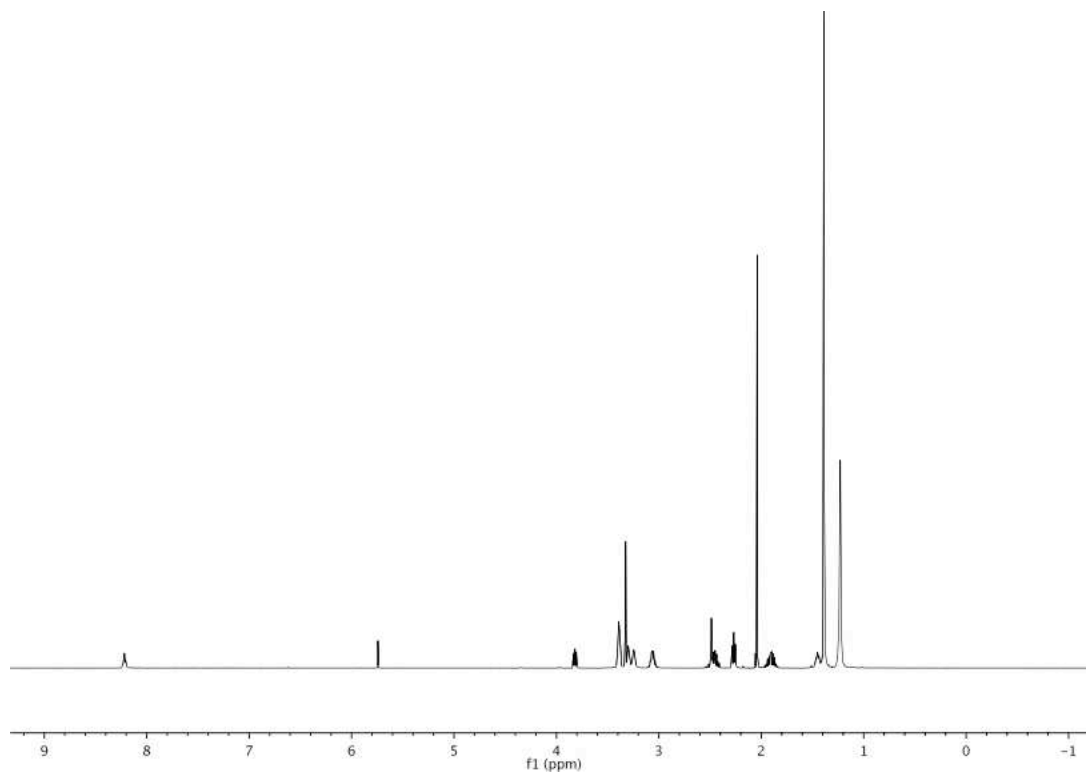

<sup>1</sup>H NMR of 8\_M

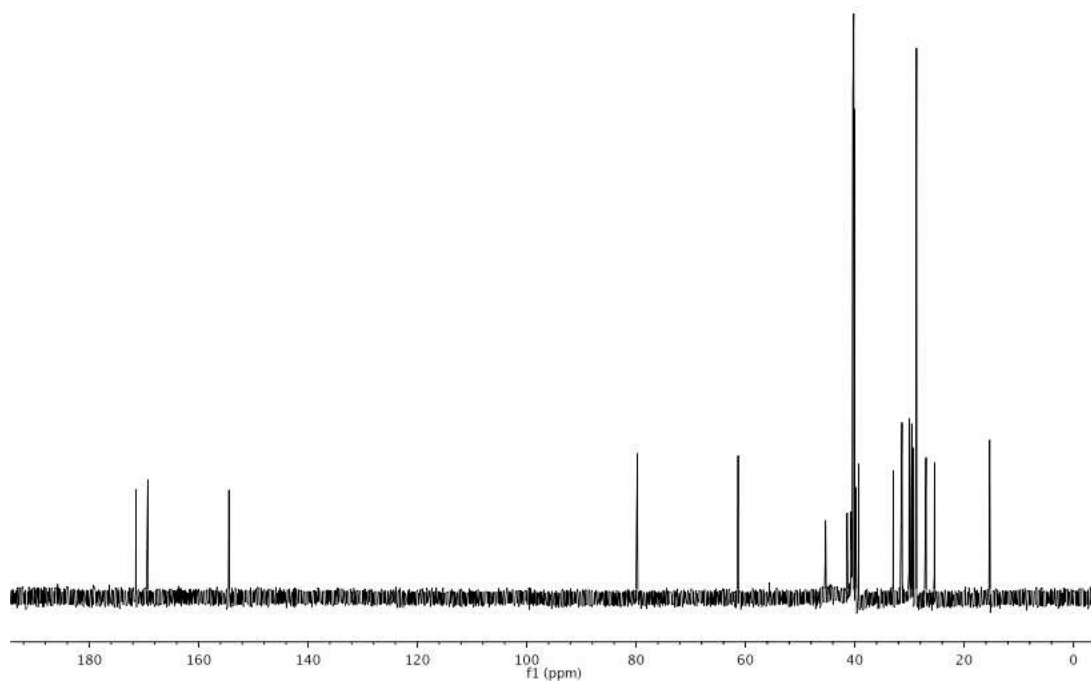 $^{13}\text{C}$  NMR of **8\_M****Compound 8\_E**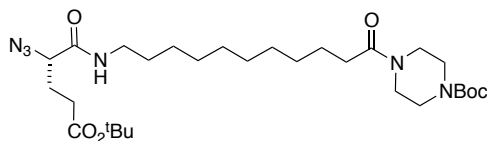

$^1\text{H}$  NMR (500 MHz,  $\text{DMSO-}d_6$ )  $\delta$  8.19 (t, 1H,  $J = 5.5$  Hz), 3.73 (dd, 1H,  $J = 6.0$  Hz,  $J = 7.5$  Hz), 3.40-3.38 (m, 4H), 3.30 (br, 2H), 3.24 (br, 2H), 3.07-3.03 (m, 2H), 2.27 (t, 2H,  $J = 7.5$  Hz), 2.22 (t, 2H,  $J = 7.5$  Hz), 1.93-1.82 (m, 2H), 1.45 (br, 1H), 1.40-1.37 (m, 21H), 1.26-1.21 (m, 12H)

$^{13}\text{C}$  NMR (125 MHz,  $\text{DMSO-}d_6$ )  $\delta$  172.2, 171.9, 171.5, 169.2, 80.6, 79.8, 61.7, 45.3, 42.5, 41.8, 39.2, 33.0, 31.7, 29.7, 29.6(2), 29.5(2), 29.4, 28.7, 28.4, 27.7, 27.2, 26.9, 25.4

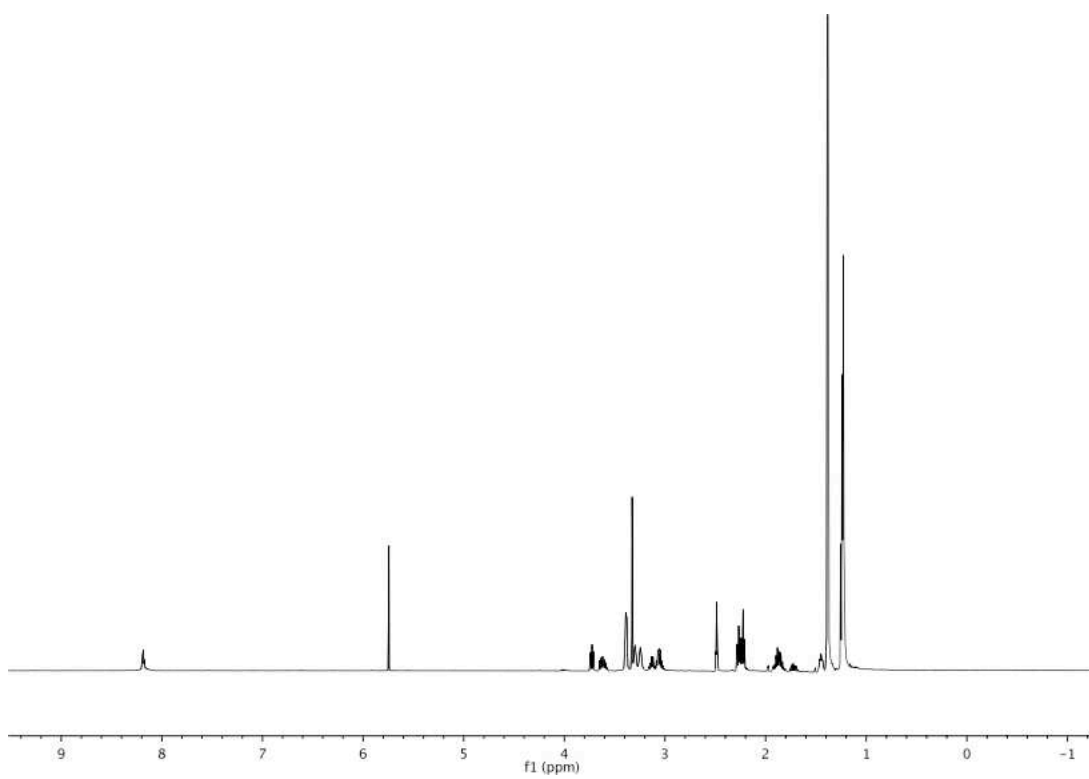 $^1\text{H}$  NMR of **8\_E**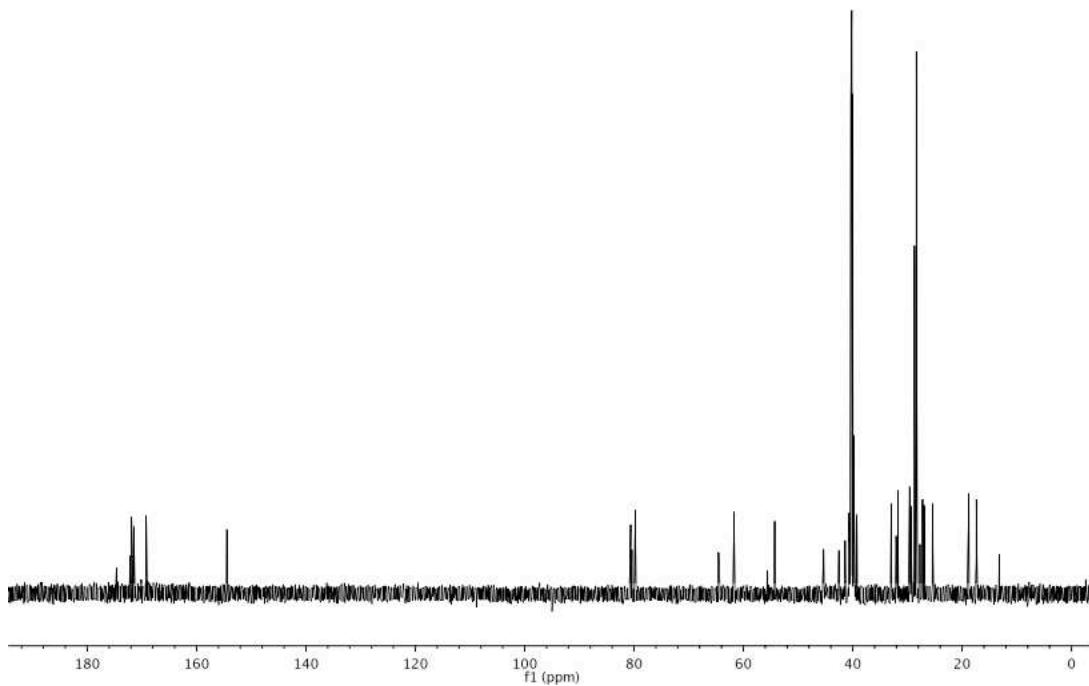 $^{13}\text{C}$  NMR of **8\_E**

## Compound 8\_I

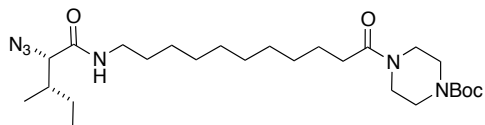

<sup>1</sup>H NMR (500 MHz, DMSO-*d*<sub>6</sub>) δ 8.16 (t, 1H, J = 5.5 Hz), 3.43-3.38 (m, 5H), 3.30 (br, 2H), 3.24 (br, 2H), 3.14-3.08 (m, 1H), 3.04-3.00 (m, 1H), 2.27 (t, 2H, J = 7.5 Hz), 1.86-1.81 (m, 1H), 1.53-1.42 (m, 3H), 1.39 (s, 12H), 1.23 (br, 11H), 1.19-1.10 (m, 1H), 0.86-0.82 (m, 6H)

<sup>13</sup>C NMR (125 MHz, DMSO-*d*<sub>6</sub>) δ 171.5, 169.4, 154.5, 79.8, 67.0, 45.3, 41.4, 39.1, 36.3, 33.0, 29.6(3), 29.5(2), 29.3, 28.7, 27.0, 25.4, 25.3, 15.9, 11.2

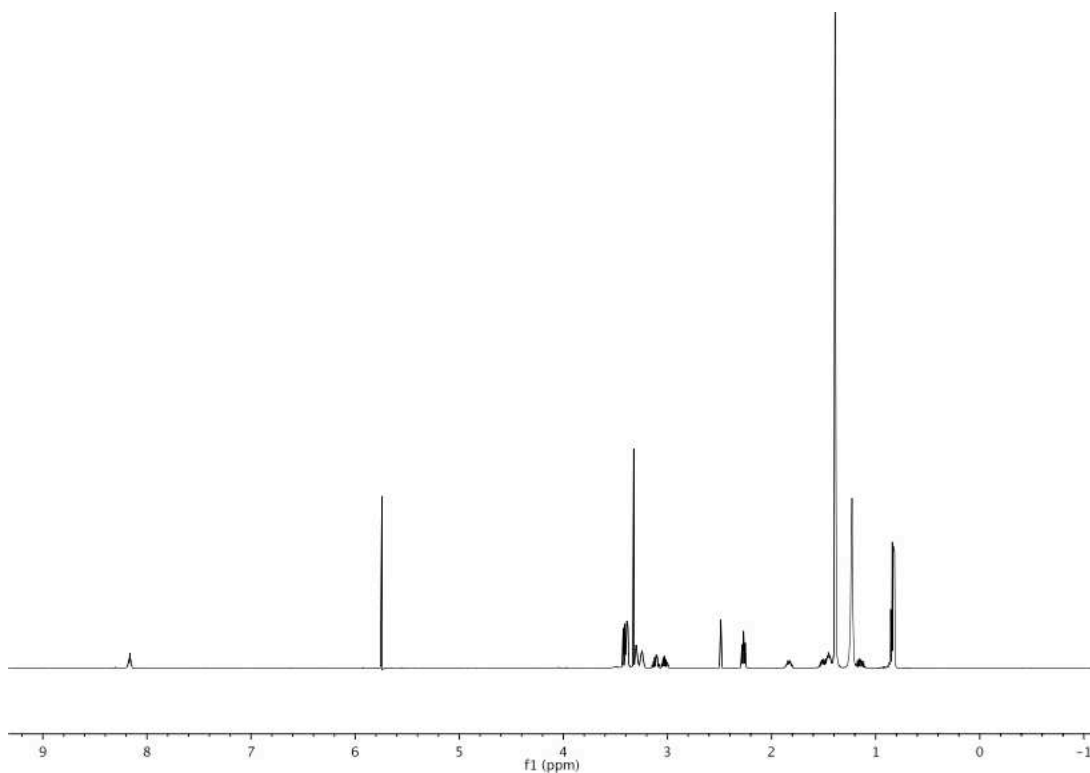

<sup>1</sup>H NMR of 8\_I



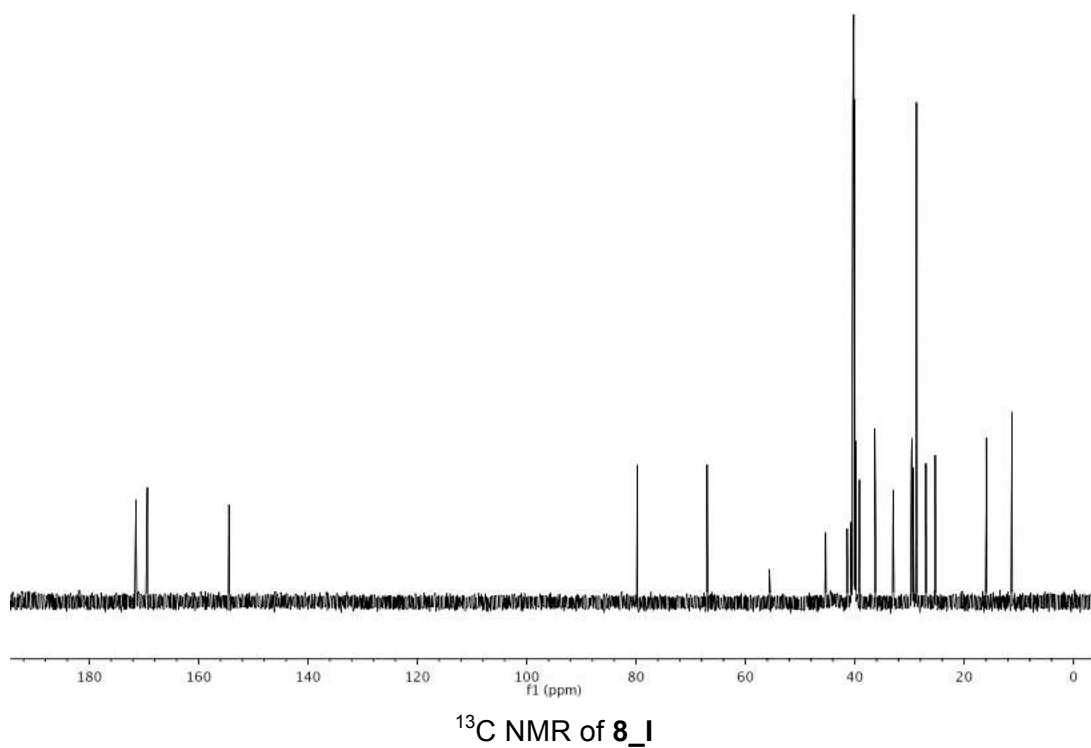

### General Procedure for Compounds **9**

Alkynes with amino acid side-chains are formed from amino acids as the following.

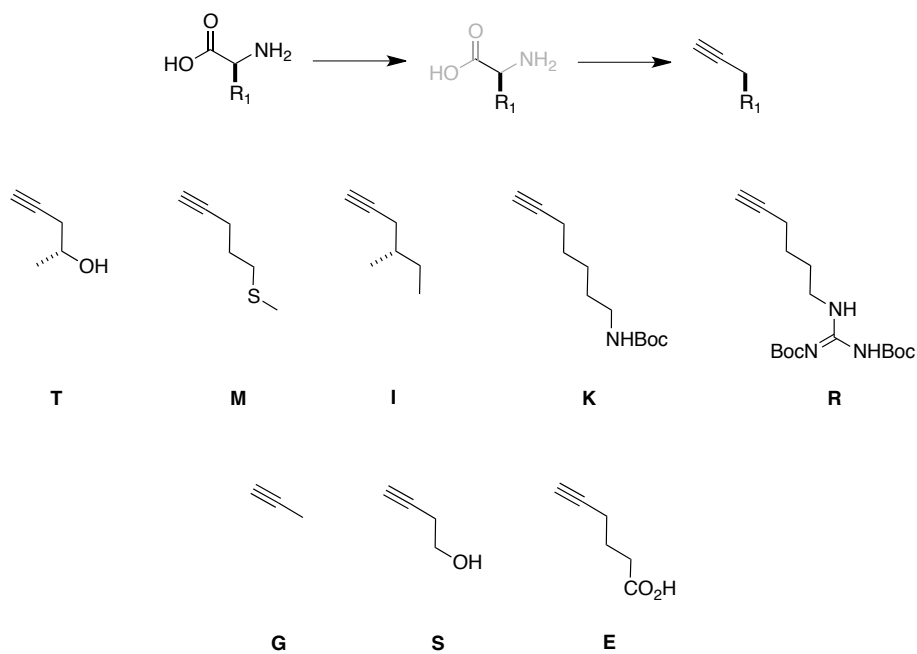

Alkynes corresponding to Gly, Ser, and Glu were obtained from commercial source and used without further purification. Thr<sup>2</sup>, Ile<sup>3</sup>, Lys<sup>4,5</sup> are known compounds.

### Compound 9\_M

To a solution of 5-chloro-1-pentyne (1.0 eq.) in DMF (0.2 M) was added sodium thiomethoxide (1.0 eq), and then the mixture was stirred at 50 °C for 4 h.<sup>7</sup> The reaction mixture was diluted with H<sub>2</sub>O and extracted with ether (x3). The combined organic phases were dried over Na<sub>2</sub>SO<sub>4</sub>. After completely removing the solvent, the compound **9\_M** was purified by flash chromatography (EtOAc/Hexanes).

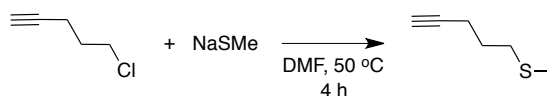

<sup>1</sup>H NMR (500 MHz, CDCl<sub>3</sub>) δ 2.60 (t, 2H, J = 11.5 Hz), 2.35-2.29 (td, 2H, J = 4.5 Hz, J = 12.0 Hz), 2.10 (s, 3H), 1.96 (t, 1H, J = 4.5 Hz), 1.86-1.77 (m, 2H)

<sup>13</sup>C NMR (125 MHz, CDCl<sub>3</sub>) N.A.

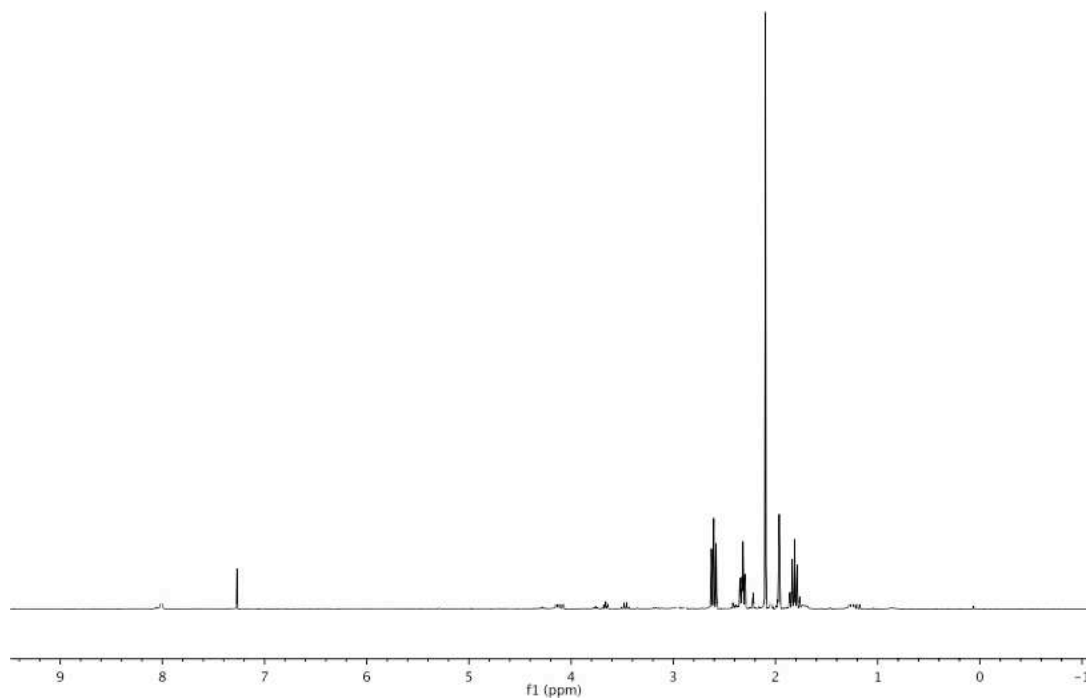

<sup>1</sup>H NMR of **9\_M**

### Compound 9\_R

To a solution of *N*-Boc-hex5-ynylamine (1.0 eq) in EtOAc:MeOH(10:1, 0.25 M) was slowly added acetyl chloride (7.0 eq) at 0 °C. The mixture was stirred at 0 °C for 2h. After 2h, the mixture was warmed to room temperature, and stirred for 4 h. The solvent was removed and then the residue was dissolved in THF (1.0 M). To the mixture was *tert*-butyl (1*H*-pyrazol-1-yl)methylenedicarbamate (1.0 eq) and Hunig's base (0.6 eq). The resulting suspension was stirred at 25 °C for 48 h. After completely removing the solvent, the compound **9\_R** was purified by flash chromatography (EtOAc/Hexanes).<sup>6</sup>

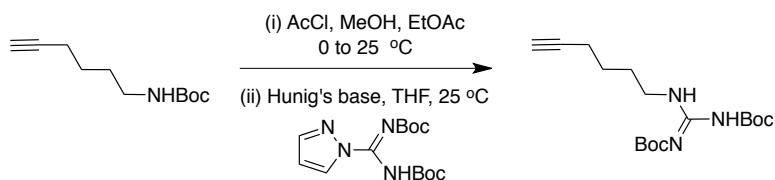

$^1\text{H}$  NMR (500 MHz,  $\text{DMSO-}d_6$ )  $\delta$  11.50 (s, 1H), 8.30 (t, 1H,  $J = 5.5$  Hz), 3.28 (td, 2H,  $J = 7.0$  Hz,  $J = 12.5$  Hz), 2.76 (t, 1H,  $J = 2.5$  Hz), 2.18 (td, 2H,  $J = 3.0$  Hz,  $J = 7.5$  Hz), 1.58-1.55 (m, 2H), 1.47-1.43 (m, 11H), 1.38 (s, 9H)

$^{13}\text{C}$  NMR (125 MHz,  $\text{DMSO-}d_6$ )  $\delta$  163.8, 155.9, 152.8, 85.0, 83.5, 78.8, 72.1, 40.3, 28.7, 28.5, 28.3, 26.0, 18.1

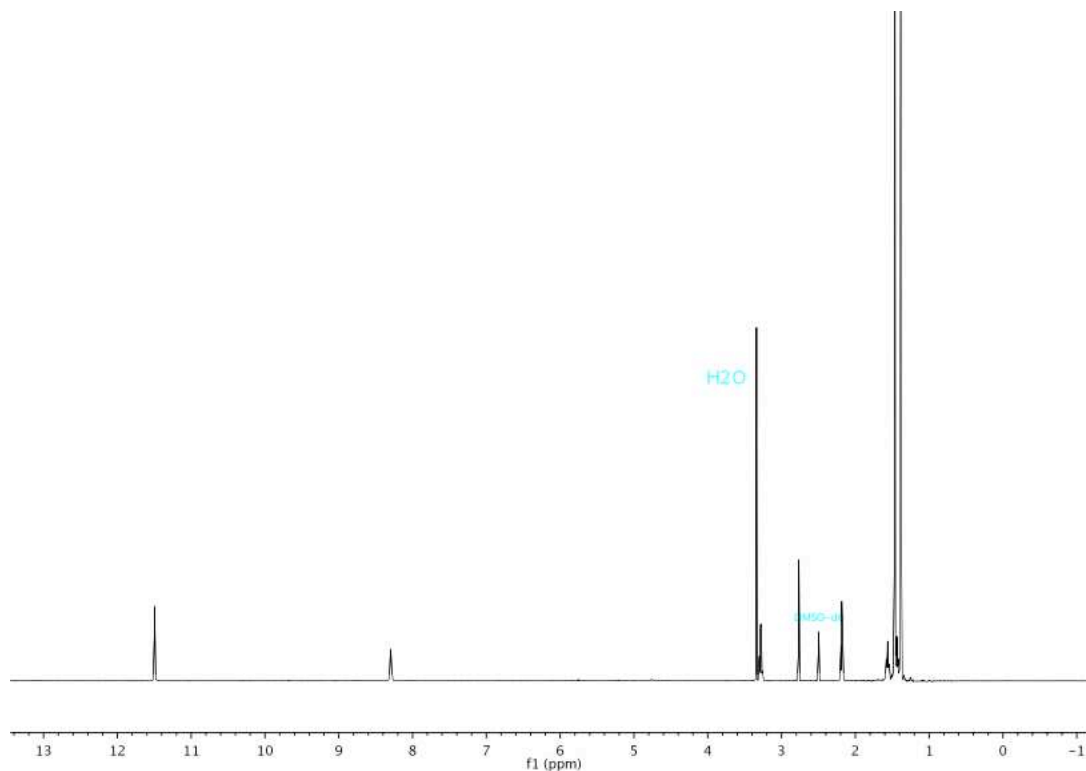

$^1\text{H}$  NMR of **9\_R**

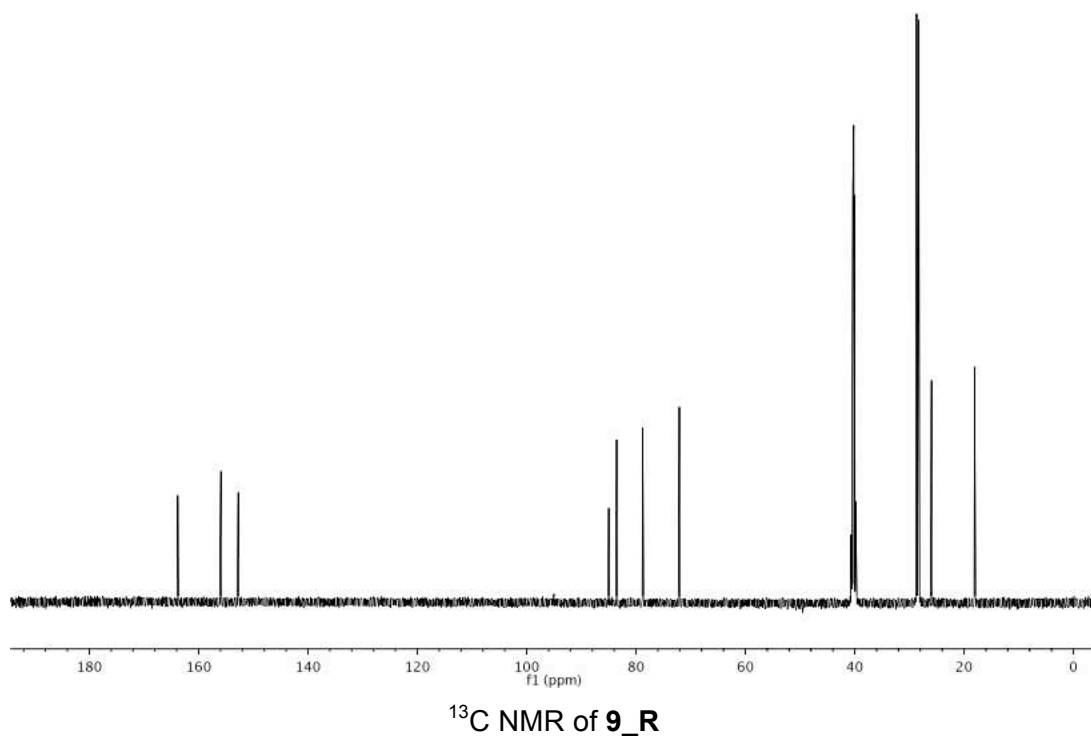

### General Procedure for Compounds **10**

Compound **8** (1.05 eq) and **9** (1.0 eq.) were dissolved in THF:H<sub>2</sub>O (5:1, 0.25 M), and then copper powder (1.0 eq.) and 1N CuSO<sub>4</sub> (aq., 0.01 eq.) were added. The mixture was stirred at 25 °C for 24 - 48 h. After the reaction, the copper powder was removed by filtration through Celite with CH<sub>2</sub>Cl<sub>2</sub> or EtOAc. The filtrate was washed with *sat.* NH<sub>4</sub>Cl (aq.): NH<sub>4</sub>OH (v:v=9:1), and then brine. The organic layer was dried over Na<sub>2</sub>SO<sub>4</sub>. After completely removing the solvent, the compound **10** derivatives were purified by flash chromatography (MeOH:CH<sub>2</sub>Cl<sub>2</sub>).

### Scheme S5. Synthesis of Compounds **10**

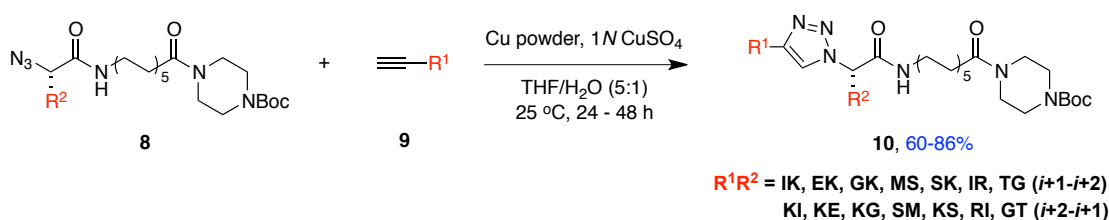

### Compound **10\_IK**

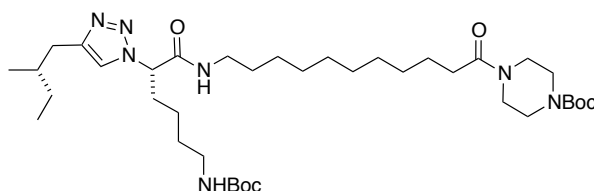

$^1\text{H}$  NMR (500 MHz, CDCl<sub>3</sub>)  $\delta$  7.51 (s, 1H), 6.74 (br, 1H), 5.09 (dd, 1H,  $J = 6.0$  Hz,  $J = 9.0$  Hz), 4.63 (s, 1H), 3.58-3.56 (m, 2H), 3.42 (s, 4H), 3.39-3.37 (m, 2H), 3.18 (td, 3H,  $J = 7.0$  Hz,  $J = 13.0$  Hz), 3.07-3.02 (m, 2H),

2.70 (dd, 1H, J = 6.0 Hz, J = 14.0 Hz), 2.51 (dd, 1H, J = 7.5 Hz, J = 13.0 Hz), 2.30 (t, 2H, J = 8.0 Hz), 2.27-2.23 (m, 1H), 2.13-2.09 (m, 2H), 1.75-1.73 (m, 1H), 1.61-1.56 (m, 3H), 1.52-1.46 (m, 2H), 1.45 (s, 9H), 1.44-1.41 (br, 11H), 1.32-1.15 (m, 14H), 0.89 (t, 3H, J = 7.5 Hz), 0.86 (d, 3H, J = 6.0 Hz)

$^{13}\text{C}$  NMR (125 MHz,  $\text{CDCl}_3$ )  $\delta$  N.A.

MS (MALDI,  $m/z$ ) calcd for  $\text{C}_{38}\text{H}_{70}\text{N}_7\text{O}_6$  ( $\text{M}+\text{H}$ ) $^+$  770.54, found 770.56

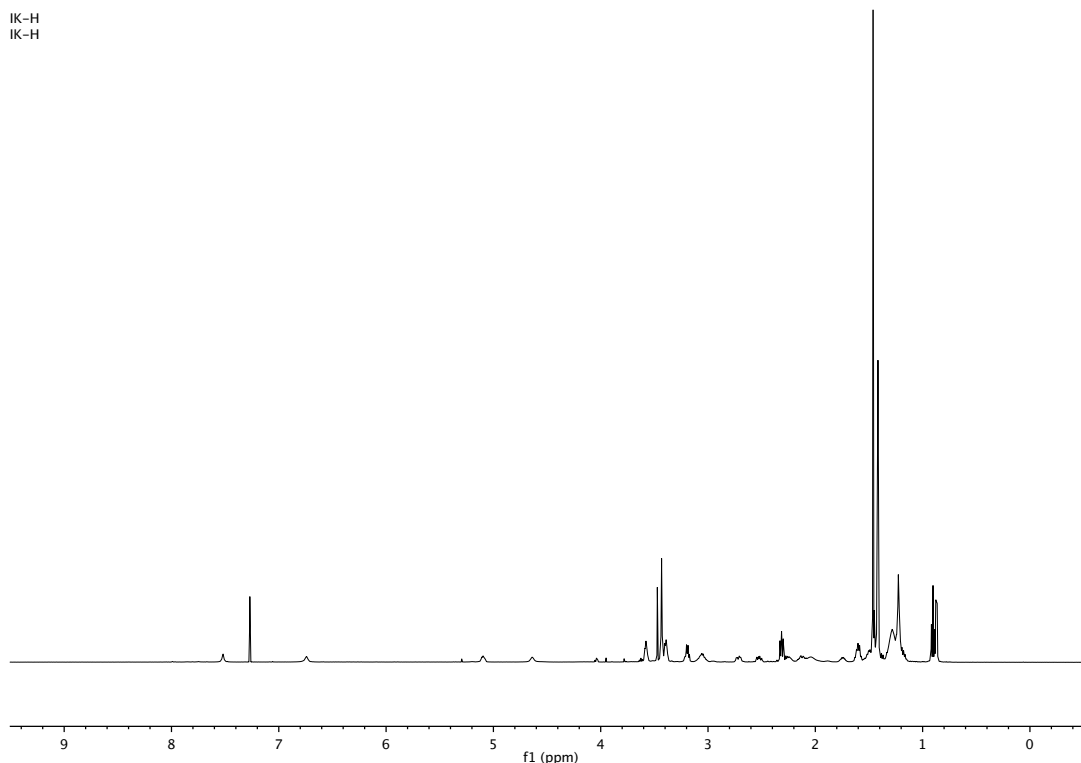

$^1\text{H}$  NMR of **10\_IK**

### Compound **10\_EK**

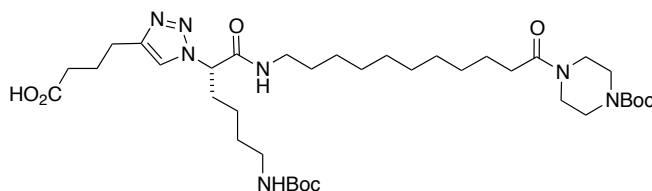

$^1\text{H}$  NMR (500 MHz,  $\text{CDCl}_3$ )  $\delta$  7.68 (s, 1H), 7.02 (s, 1H), 5.19 (dd, 1H, J = 6.5 Hz, J = 9.0 Hz), 4.77 (s, 1H), 3.59-3.57 (m, 2H), 3.43 (br, 4H), 3.38-3.36 (m, 2H), 3.18 (td, 3H, J = 6.0 Hz, J = 13.0 Hz), 3.03 (br, 2H), 2.80 (t, 2H, 7.5 Hz), 2.40-2.36 (m, 2H), 2.31 (t, 2H, J = 7.5 Hz), 2.03-2.00 (m, 2H), 1.59-1.56 (m, 2H), 1.52-1.45 (m, 2H), 1.44 (s, 9H), 1.42 (br, 11H), 1.26-1.19 (m, 16H)

$^{13}\text{C}$  NMR (125 MHz,  $\text{CDCl}_3$ )  $\delta$  176.1, 172.6, 168.5, 156.6, 155.0, 147.5, 121.6, 80.6, 79.5, 64.5, 45.7, 41.6, 40.2, 40.0, 33.6, 33.5, 32.8, 30.0, 29.6(2), 29.5, 29.3, 28.6(2), 27.0, 25.5, 25.0, 24.5, 23.1

MS (MALDI,  $m/z$ ) calcd for  $\text{C}_{37}\text{H}_{66}\text{N}_7\text{O}_8$  ( $\text{M}+\text{H}$ ) $^+$  736.50, found 736.48

EK-H  
EK-H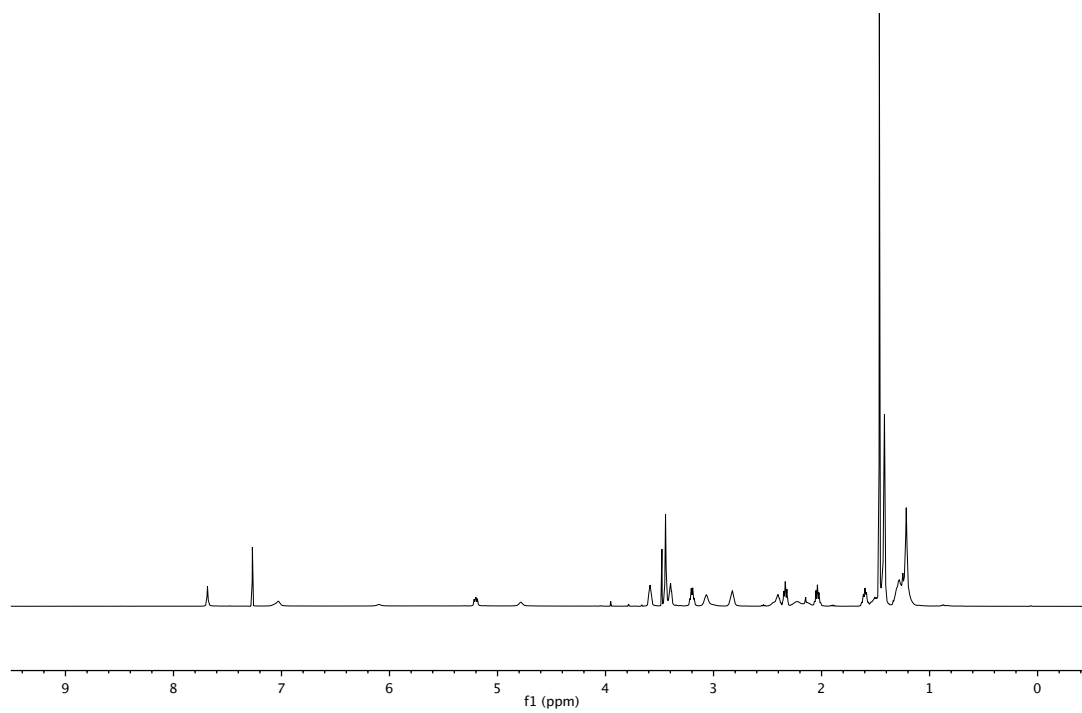 $^1\text{H}$  NMR of 10\_EKEK-C13  
EK-C13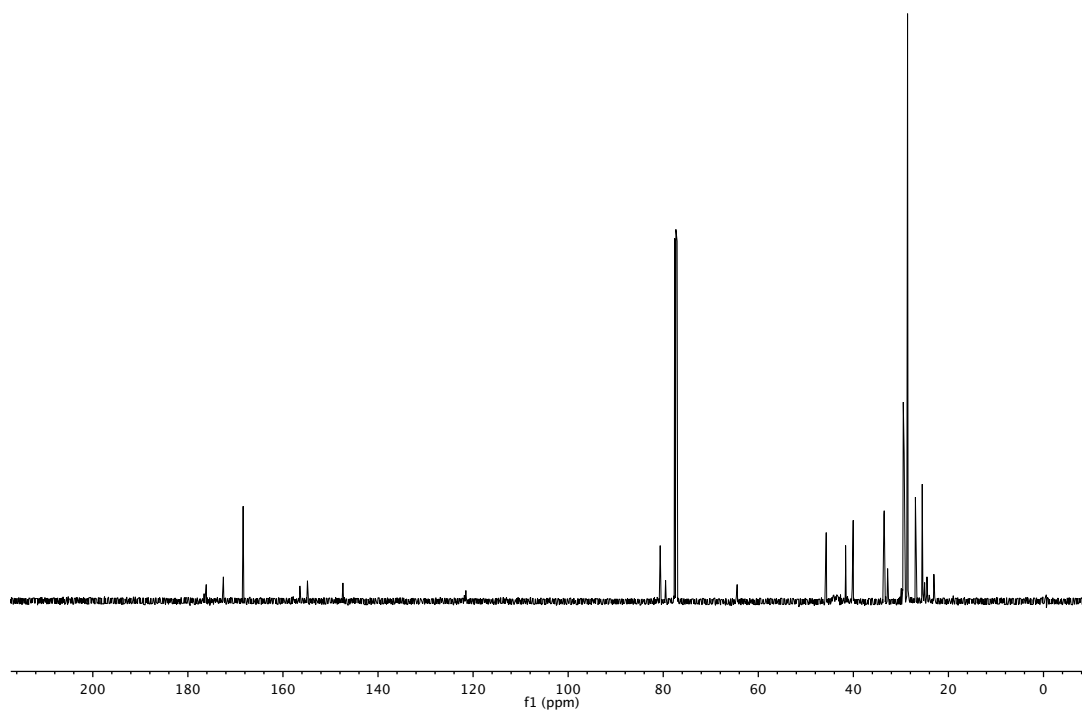 $^{13}\text{C}$  NMR of 10\_EK

## Compound 10\_GK

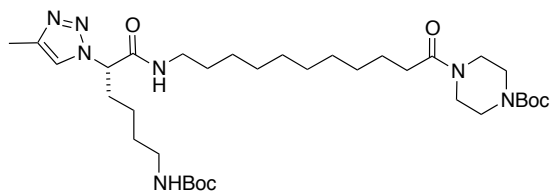

$^1\text{H}$  NMR (500 MHz,  $\text{CDCl}_3$ )  $\delta$  7.51 (s, 1H), 6.71 (br, 1H), 5.06 (dd, 1H,  $J = 10.0$  Hz,  $J = 15.5$  Hz), 4.63 (br, 1H), 3.58-3.55 (m, 2H), 3.42 (br, 4H), 3.40-3.36 (m, 2H), 3.18 (td, 2H,  $J = 11.0$  Hz,  $J = 22.0$  Hz), 3.06-3.01 (m, 2H), 2.34 (s, 3H), 2.33 (t, 2H,  $J = 3.5$  Hz), 2.78-1.97 (m, 2H), 1.16-1.56 (m, 2H), 1.54-1.47 (m, 2H), 1.44 (s, 9H), 1.43 (s, 11H), 1.30-1.18 (m, 14H)

$^{13}\text{C}$  NMR (125 MHz,  $\text{CDCl}_3$ )  $\delta$  172.3, 168.4, 156.3, 154.9, 80.5, 79.4, 64.7, 45.7, 41.6, 40.2, 40.0, 33.6, 32.9, 29.6(3), 29.5(2), 29.4, 29.3, 28.7, 28.6, 27.0, 25.5, 23.2, 11.1 (two carbon peaks on triazole ring are missed, but methyl group peak on the triazole ring is shown in 11.1. In addition, H NMR clearly shows a proton peak (7.51 pm) on the triazole.)

MS (MALDI,  $m/z$ ) calcd for  $\text{C}_{34}\text{H}_{62}\text{N}_7\text{O}_6$  ( $\text{M}+\text{H}$ ) $^+$  664.48, found 664.24

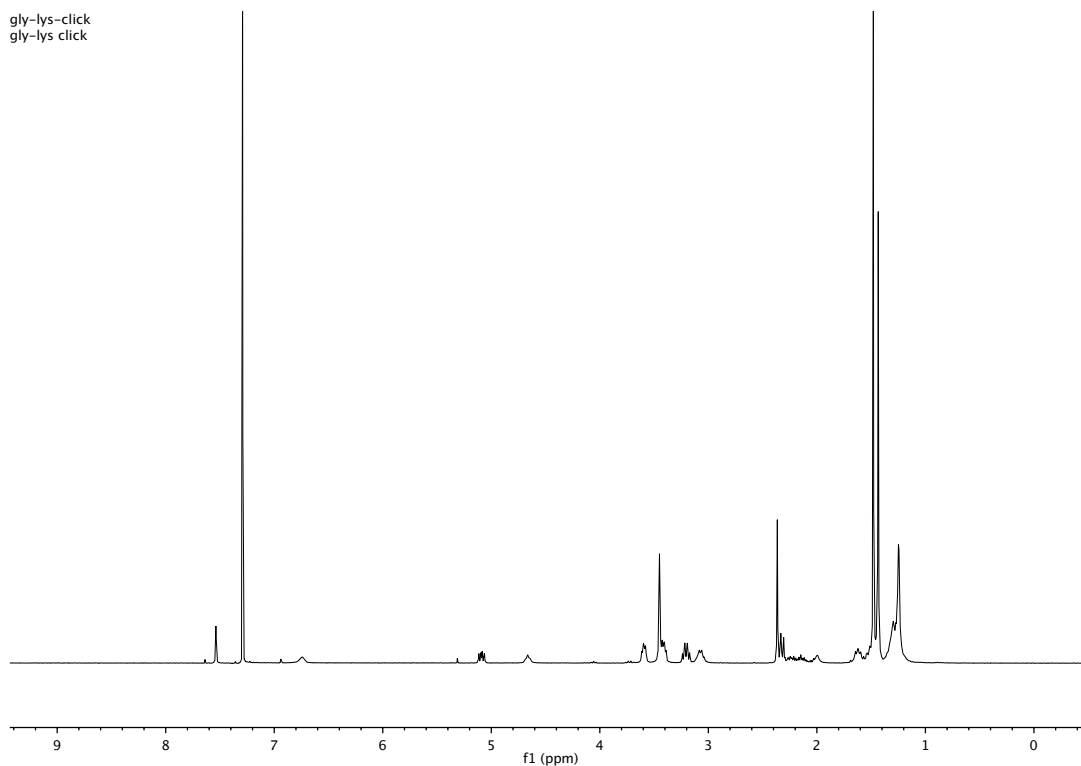

$^1\text{H}$  NMR of 10\_GK

GK-C13  
GK-C13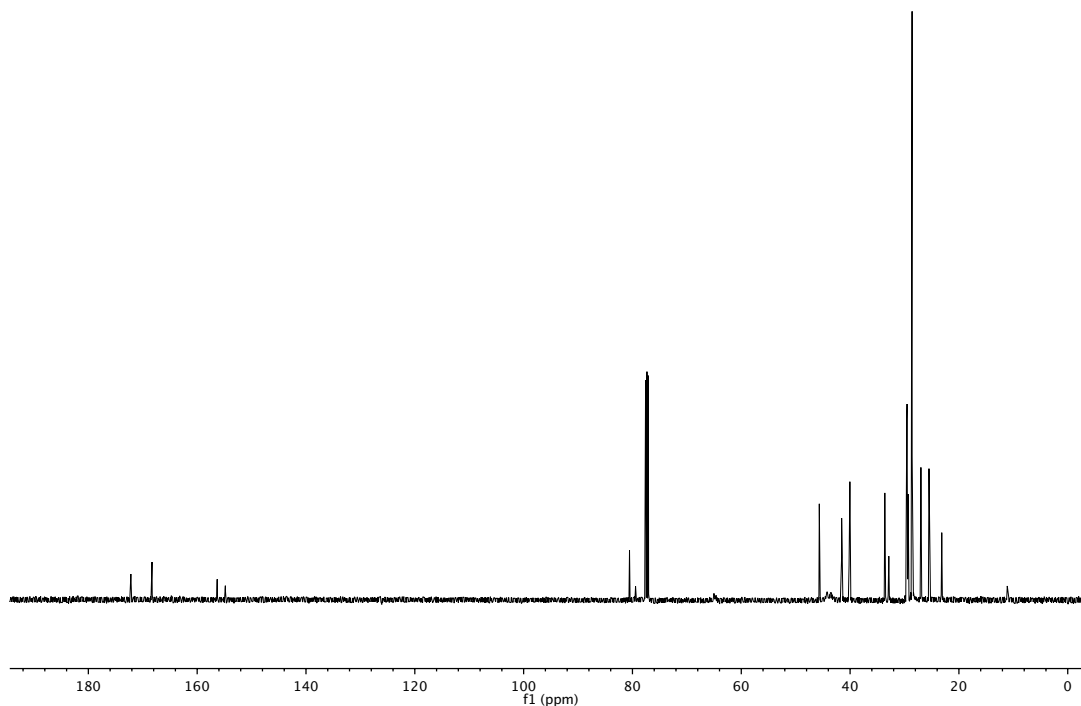 $^{13}\text{C}$  NMR of 10\_GK

## Compound 10\_MS

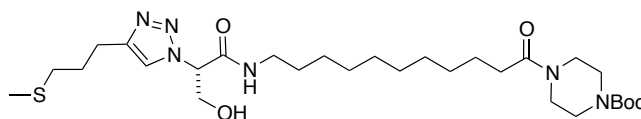

$^1\text{H}$  NMR (500 MHz,  $\text{CDCl}_3$ )  $\delta$  7.82 (s, 1H), 6.98 (br, 1H), 6.37 (dd, 1H,  $J = 4.0$  Hz,  $J = 5.0$  Hz), 4.30 (dd, 1H,  $J = 5.5$  Hz,  $J = 12.0$  Hz), 4.19 (dd, 1H,  $J = 4.0$  Hz,  $J = 12.0$  Hz), 3.58-3.56 (m, 2H), 3.41 (s, 4H), 3.40-3.38 (m, 2H), 3.22 (td, 2H,  $J = 7.0$  Hz,  $J = 13.0$  Hz), 2.87 (t, 2H,  $J = 6.5$  Hz), 2.56 (t, 2H,  $J = 7.5$  Hz), 2.32 (t, 2H,  $J = 7.5$  Hz), 2.09 (s, 3H), 2.03-1.97 (m, 2H), 1.63-1.57 (m, 2H), 1.47 (s, 11H), 1.33-1.24 (m, 12H)

$^{13}\text{C}$  NMR (125 MHz,  $\text{CDCl}_3$ )  $\delta$  172.2, 167.1, 154.8, 147.6, 122.0, 80.5, 76.9, 65.1, 63.0, 45.6, 41.6, 40.1, 33.8, 33.6, 29.6, 29.5(2), 29.4, 29.3, 29.2, 28.6(2), 26.9, 25.4, 15.6

MS (MALDI,  $m/z$ ) calcd for  $\text{C}_{29}\text{H}_{53}\text{N}_6\text{O}_5\text{S}$  ( $\text{M}+\text{H}$ ) $^+$  597.38, found 597.38



MS-H  
MS-H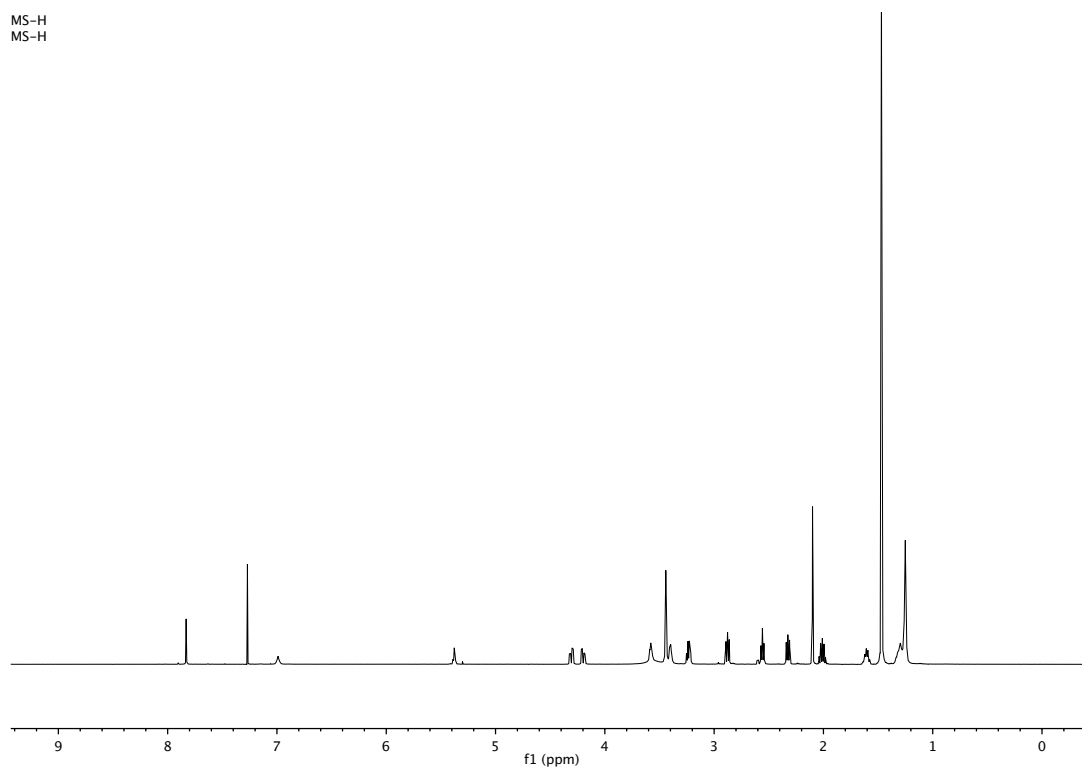 $^1\text{H}$  NMR of **10\_MS**C13MSclick  
C13NS click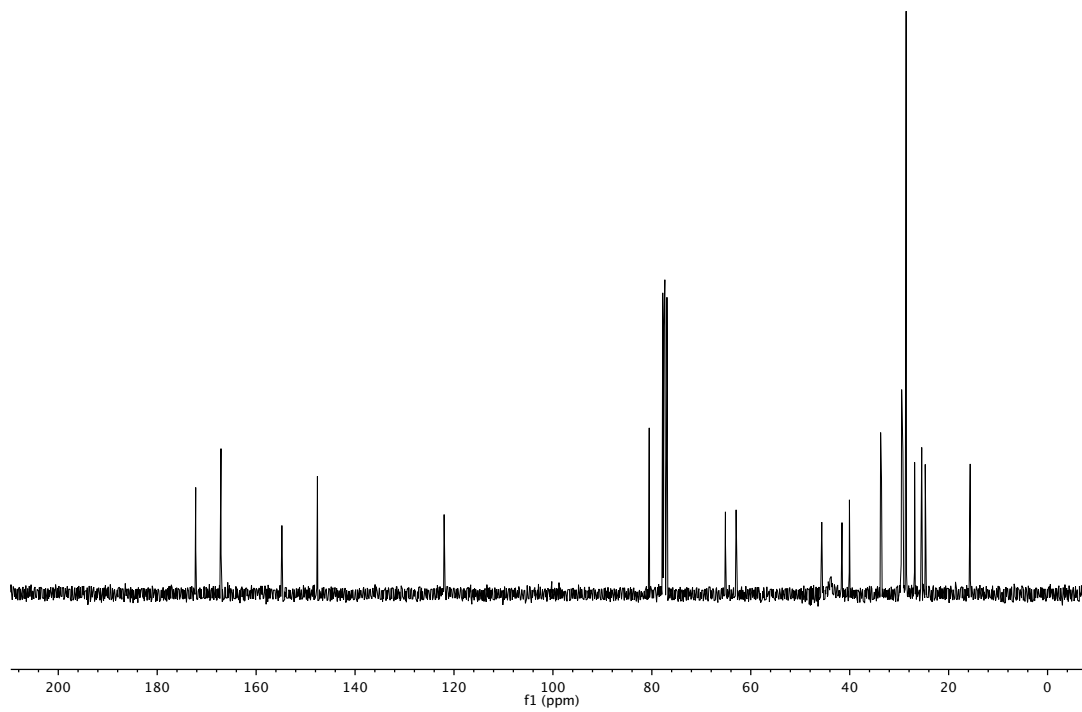 $^{13}\text{C}$  NMR of **10\_MS**

## Compound 10\_SK

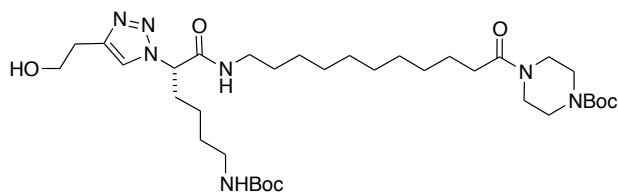

$^1\text{H}$  NMR (500 MHz,  $\text{CDCl}_3$ )  $\delta$  7.74 (s, 1H), 7.10 (br, 1H), 5.18 (dd, 1H,  $J = 6.5$  Hz,  $J = 9.0$  Hz), 4.76 (br, 1H), 3.91 (t, 2H,  $J = 6.0$  Hz), 3.58-3.56 (m, 2H), 3.42 (br, 4H), 3.39-3.37 (m, 2H), 3.18 (td, 2H,  $J = 6.0$  Hz,  $J = 13.5$  Hz), 3.07-3.01 (m, 2H), 2.95 (t, 2H,  $J = 6.0$  Hz), 2.70 (br, 1H), 2.31 (t, 2H,  $J = 7.5$  Hz), 2.25-2.19 (m, 1H), 2.13-2.06 (m, 1H), 1.62-1.56 (m, 2H), 1.50-1.47 (m, 2H), 1.45 (s, 9H), 1.41 (s, 11H), 1.32-1.29 (m, 14H)

$^{13}\text{C}$  NMR (125 MHz,  $\text{CDCl}_3$ )  $\delta$  172.0, 167.9, 156.2, 154.7, 145.6, 121.8, 80.3, 79.2, 64.3, 61.2, 45.4, 41.3, 39.8, 33.3, 32.4, 29.6, 29.3(2), 29.2(2), 29.1, 29.0(2), 28.7, 28.4, 28.3, 26.6, 25.2, 22.7

MS (MALDI,  $m/z$ ) calcd for  $\text{C}_{35}\text{H}_{64}\text{N}_7\text{O}_7$  ( $\text{M}+\text{H}$ ) $^+$  694.49, found 694.43

SK-H  
SK-H

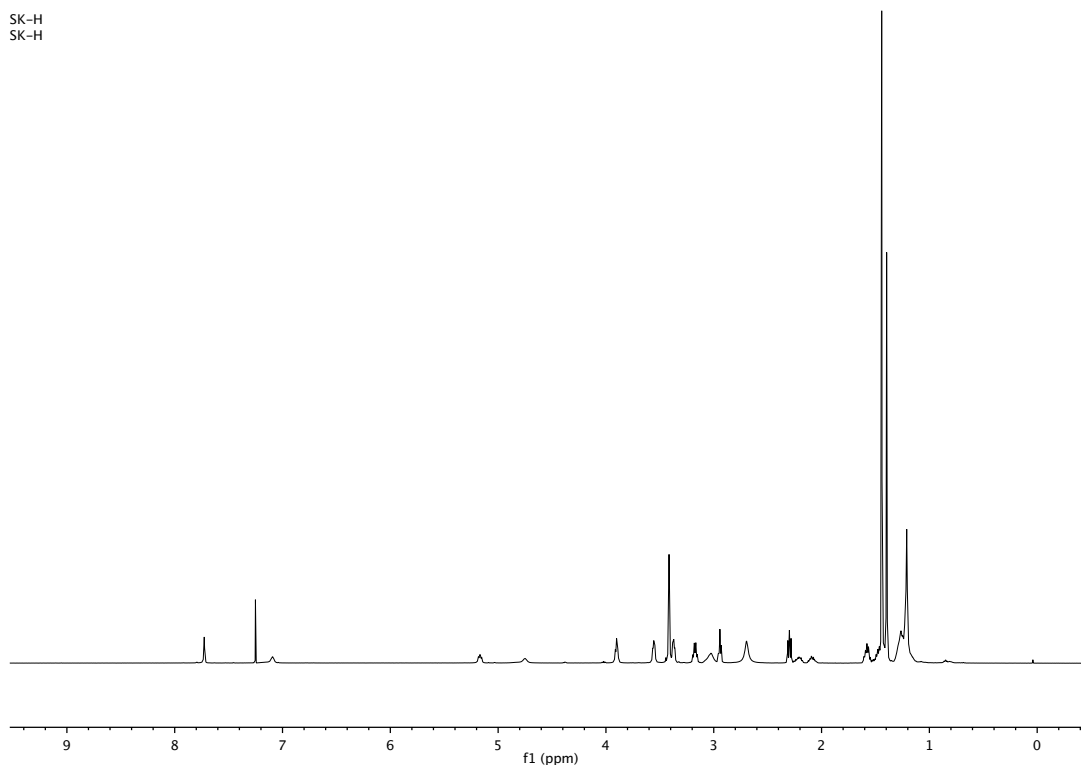

$^1\text{H}$  NMR of 10\_SK

c13SK  
c13SK0819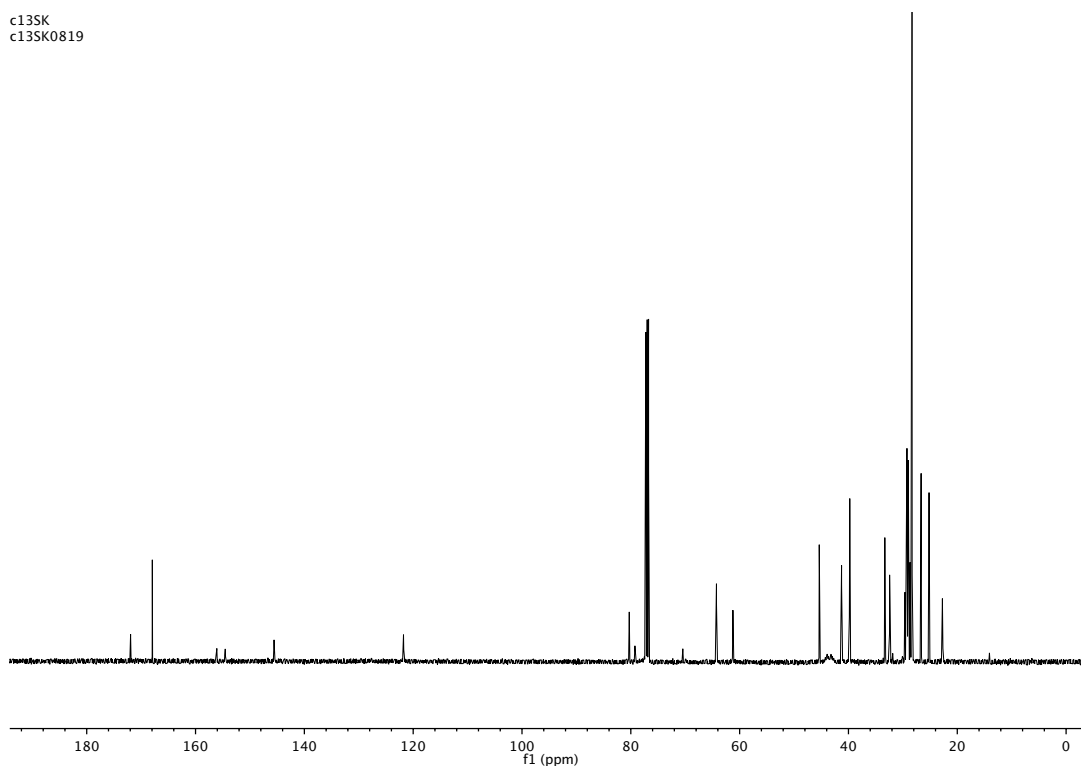 $^{13}\text{C}$  NMR of **10\_SK****Compound 10\_IR**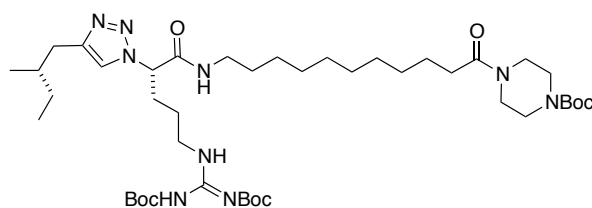

$^1\text{H}$  NMR (500 MHz,  $\text{CDCl}_3$ )  $\delta$  8.36 (t, 1H,  $J = 9.5$  Hz), 7.58 (s, 1H), 6.79 (t, 1H,  $J = 9.0$  Hz), 5.29 (dd, 1H,  $J = 10.0$  Hz,  $J = 15.0$  Hz), 3.60-3.54 (m, 2H), 3.43 (s, 4H), 3.39-3.34 (m, 4H), 3.28-3.12 (m, 2H), 2.71 (dd, 1H,  $J = 10.0$  Hz,  $J = 24.5$  Hz), 2.51 (dd, 1H,  $J = 13.5$  Hz,  $J = 24.0$  Hz), 2.35-2.29 (m, 3H), 2.26-2.22 (m, 1H), 2.17-2.07 (m, 1H), 1.95 (br, 2H), 1.77-1.70 (m, 1H), 1.63-1.51 (m, 3H), 1.49 (s, 9H), 1.48 (s, 8H), 1.46-1.43 (m, 11H), 1.30-1.16 (m, 12H), 0.90 (t, 3H,  $J = 12.5$  Hz), 0.87 (d, 3H,  $J = 12.5$  Hz)

$^{13}\text{C}$  NMR (125 MHz,  $\text{CDCl}_3$ )  $\delta$  171.8, 168.0, 162.5, 156.2, 154.6, 152.9, 147.3, 121.1, 83.5, 80.2, 79.9, 63.1, 45.3, 41.2, 39.7, 39.4, 34.8, 33.3, 32.6, 30.1, 29.3, 29.2(2), 29.1, 29.0, 28.2, 28.1, 27.9, 26.6, 25.3, 25.2, 18.9, 11.3

MS (MALDI,  $m/z$ ) calcd for  $\text{C}_{43}\text{H}_{78}\text{N}_9\text{O}_8$  ( $\text{M}+\text{H}$ ) $^+$  848.60, found 848.75

IR  
IR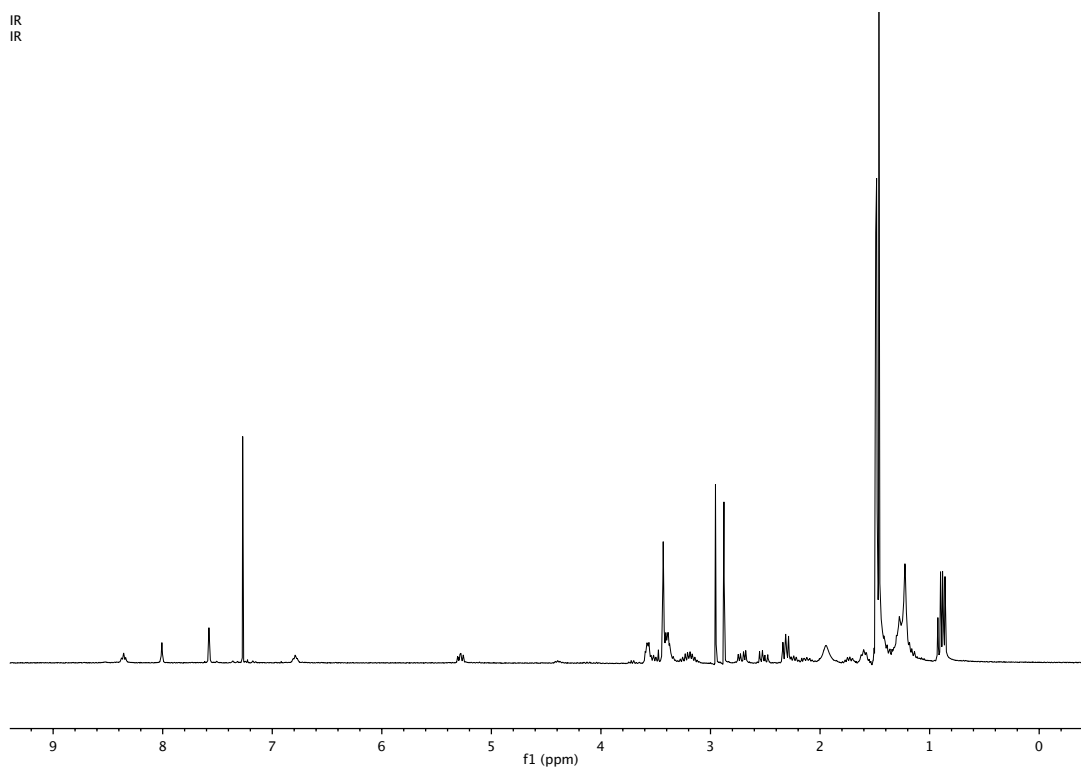 $^1\text{H}$  NMR of 10\_IRIR-C0723  
IR-C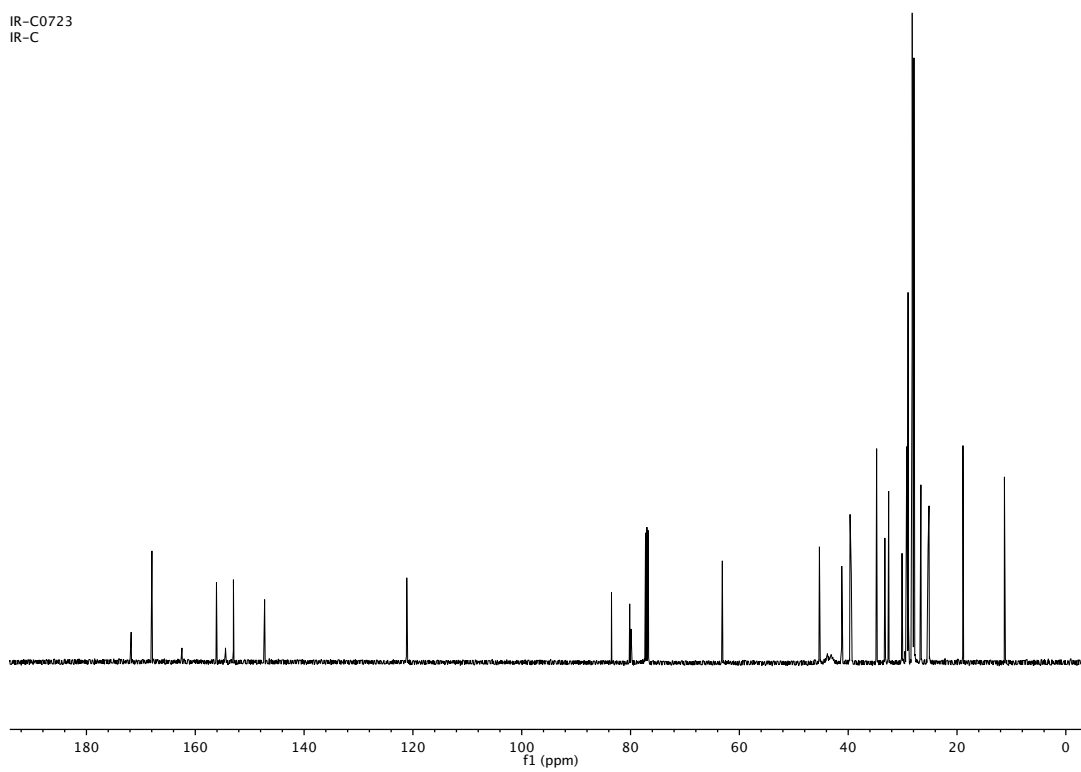 $^{13}\text{C}$  NMR of 10\_IR

## Compound 10\_TG

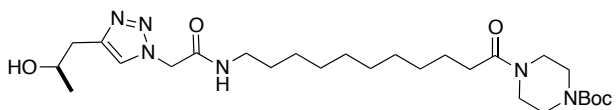

$^1\text{H}$  NMR (500 MHz,  $\text{CDCl}_3$ )  $\delta$  7.56 (s, 1H), 6.30 (br, 1H), 5.00 (s, 1H), 4.17-4.11 (m, 1H), 3.59-3.56 (m, 2H), 3.43 (s, 4H), 3.43-3.37 (m, 2H), 3.21 (td, 2H,  $J = 11.5$  Hz,  $J = 21.5$  Hz), 2.94 (br, 1H), 2.91 (dd, 1H,  $J = 6.5$  Hz,  $J = 25.0$  Hz), 2.79 (dd, 1H,  $J = 13.5$  Hz,  $J = 25.0$  Hz), 2.34-2.28 (m, 2H), 1.63-1.53 (m, 2H), 1.45 (s, 11H), 1.30-1.20 (m, 15H)

$^{13}\text{C}$  NMR (125 MHz,  $\text{CDCl}_3$ )  $\delta$  172.2, 165.5, 161.5, 154.8, 147.5, 123.7, 80.6, 67.2, 53.3, 45.7, 41.6, 40.1, 35.1, 33.6, 29.6, 29.5, 29.4(2), 29.3, 28.7, 26.9, 25.5, 23.2

MS (MALDI,  $m/z$ ) calcd for  $\text{C}_{27}\text{H}_{49}\text{N}_6\text{O}_5$  ( $\text{M}+\text{H}$ ) $^+$  537.38, found 537.35

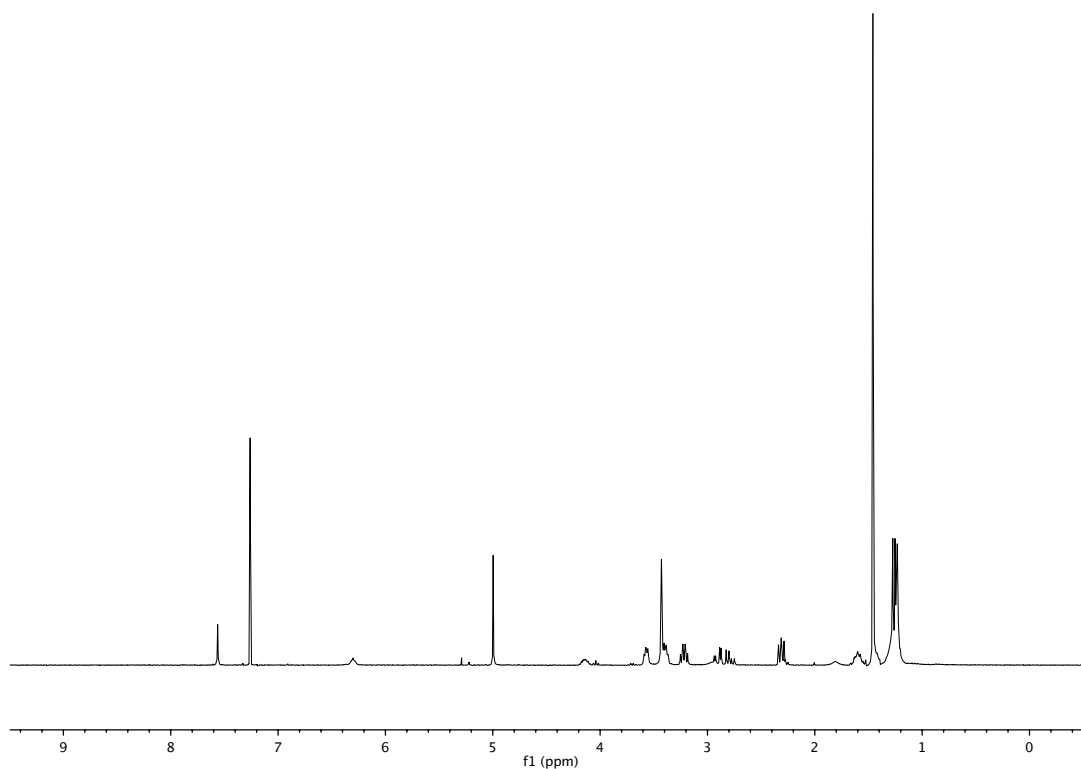

$^1\text{H}$  NMR of 10\_TG

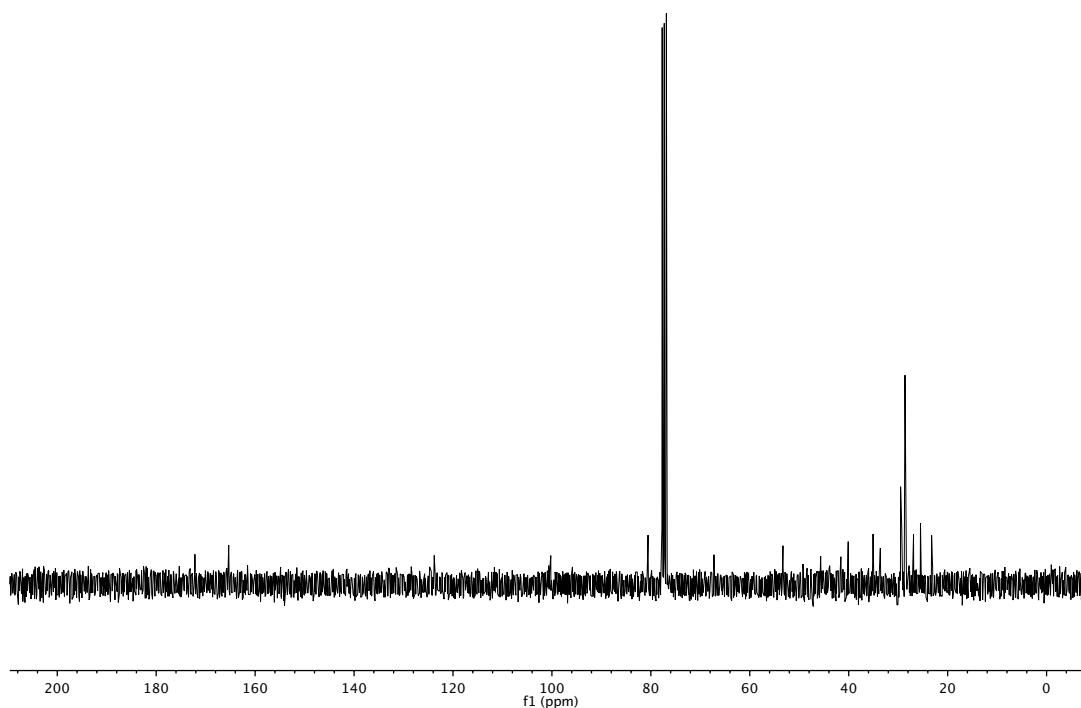 $^{13}\text{C}$  NMR of 10\_TG**Compound 10\_KI**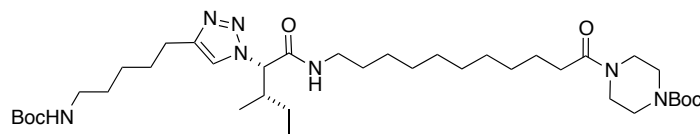

$^1\text{H}$  NMR (500 MHz,  $\text{DMSO-}d_6$ )  $\delta$  8.55 (t, 1H,  $J = 5.5$  Hz), 7.88 (s, 1H), 6.77 (t, 1H,  $J = 6.0$  Hz), 4.95 (d, 1H,  $J = 11.0$  Hz), 3.41-3.25 (m, 8H), 3.15-2.95 (m, 2H), 2.89 (q, 2H,  $J = 7.5$  Hz), 2.59 (t, 2H,  $J = 6.0$  Hz), 2.29 (t, 2H,  $J = 6.0$  Hz), 2.20 (m, 1H), 1.58 (m, 2H), 1.39 (m, 24H), 1.26 (m, 15H), 0.90 (d, 3H,  $J = 6.5$  Hz), 0.75 (t, 3H,  $J = 7$  Hz)

$^{13}\text{C}$  NMR (126 MHz,  $\text{DMSO-}d_6$ )  $\delta$  171.5, 168.1, 156.2, 154.4, 147.6, 120.9, 95.0, 79.8, 77.9, 67.8, 45.31, 41.4, 39.2, 37.2, 33.0, 29.9, 29.6, 29.6, 29.5, 29.3, 29.3, 28.9, 28.7, 26.9, 26.6, 25.7, 25.4, 25.0, 15.7, 10.5

MS (MALDI,  $m/z$ ) calcd for  $\text{C}_{38}\text{H}_{70}\text{N}_7\text{O}_8$  ( $\text{M}+\text{H}$ ) $^+$  720.54, found 720.58

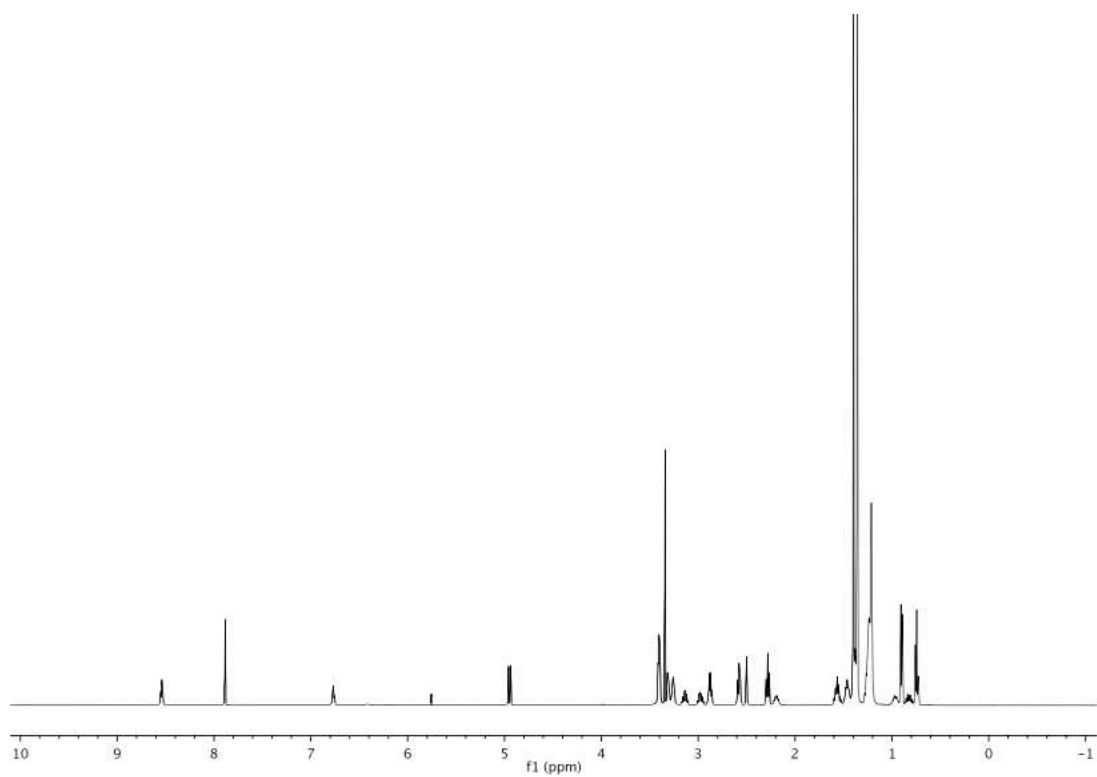 $^1\text{H}$  NMR of 10\_KI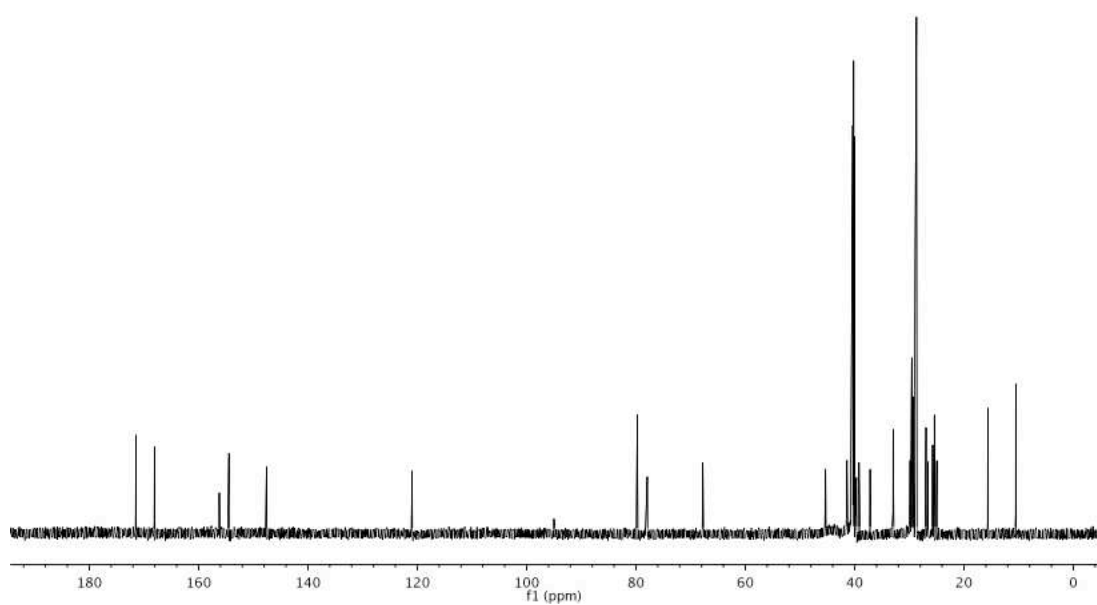 $^{13}\text{C}$  NMR of 10\_KI

## Compound 10\_KE

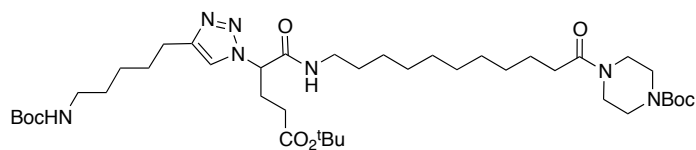

$^1\text{H}$  NMR (500 MHz,  $\text{DMSO-}d_6$ )  $\delta$  8.42 (t, 1H,  $J = 5.5$  Hz), 7.88 (s, 1H), 6.78 (t, 1H,  $J = 6.0$  Hz), 5.19 (t, 1H,  $J = 8.0$  Hz), 3.40-3.25 (m, 8H), 3.11-2.99 (m, 2H), 2.90 (q, 2H,  $J = 6.5$  Hz), 2.59 (t, 2H,  $J = 6.0$  Hz), 2.29-2.04 (m, 6H), 1.58 (m, 2H), 1.39 (m, 37H), 1.21 (m, 14H)

$^{13}\text{C}$  NMR (126 MHz,  $\text{DMSO-}d_6$ )  $\delta$  171.5(2), 167.8, 156.2, 154.4, 147.6, 121.4, 80.7, 79.8, 77.9, 62.5, 45.3, 41.4, 39.3, 33.0, 31.5, 29.9, 29.7, 29.6(2), 29.5, 29.3(2), 28.9, 28.7, 28.4, 28.0, 26.9, 26.6, 25.7, 25.4

MS (MALDI,  $m/z$ ) calcd for  $\text{C}_{41}\text{H}_{74}\text{N}_7\text{O}_8$  ( $\text{M}+\text{H}$ ) $^+$  792.06, found 792.64

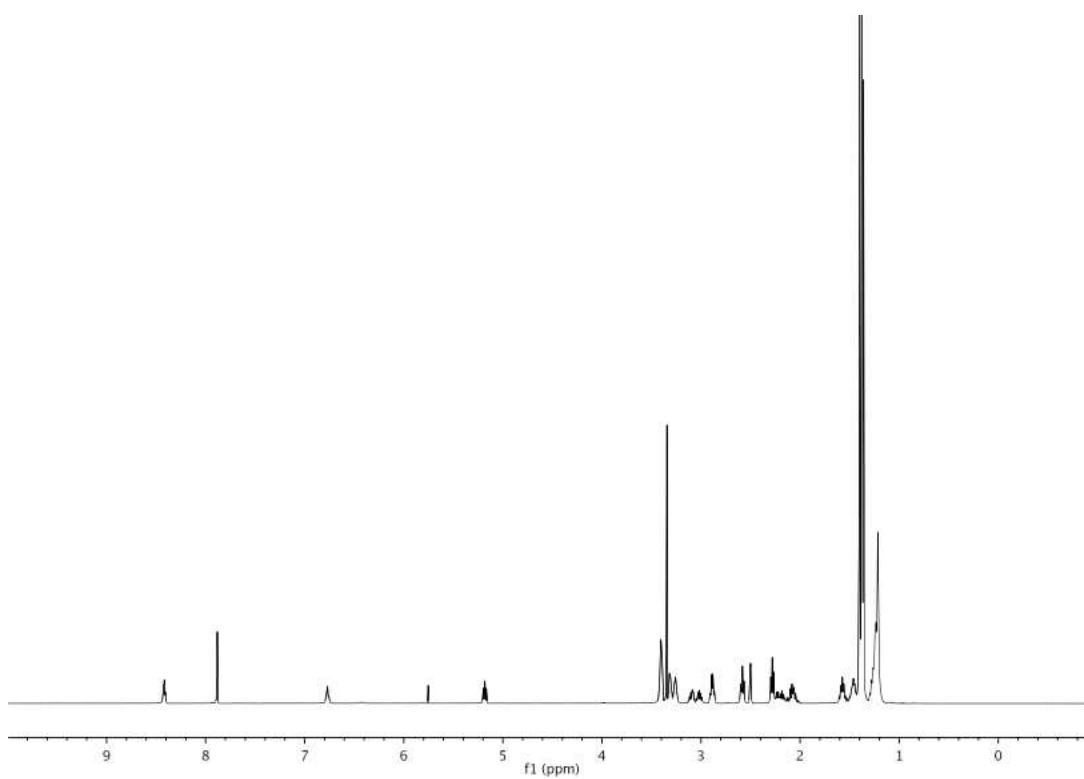

$^1\text{H}$  NMR of 10\_KE



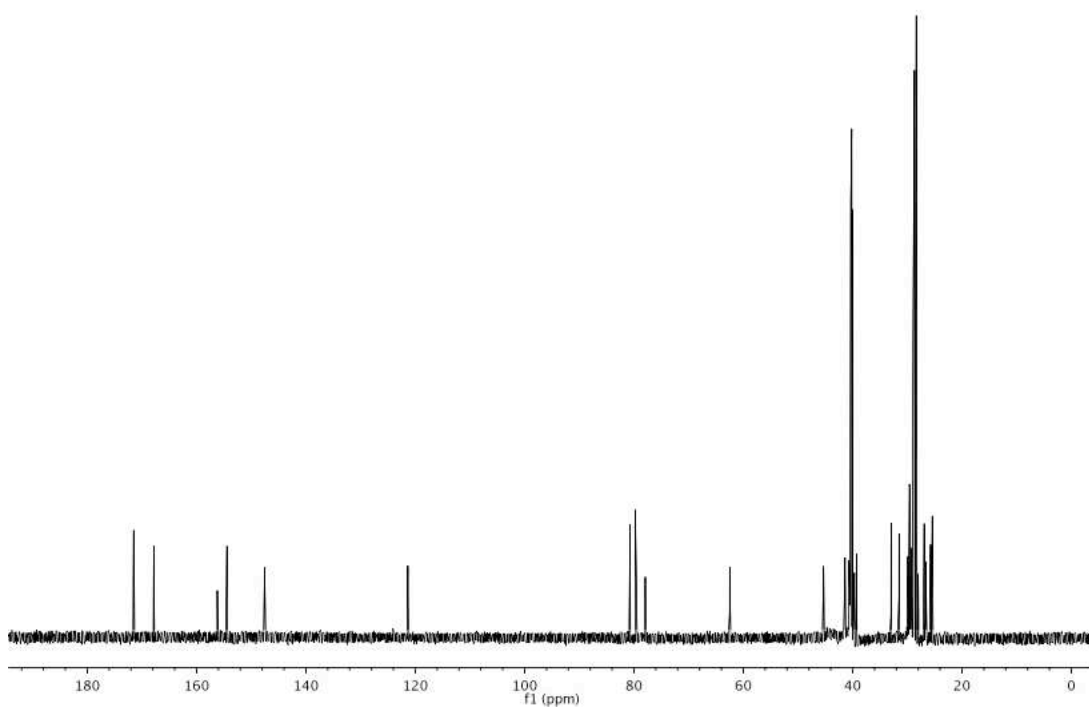 $^{13}\text{C}$  NMR of 10\_KE**Compound 10\_KG**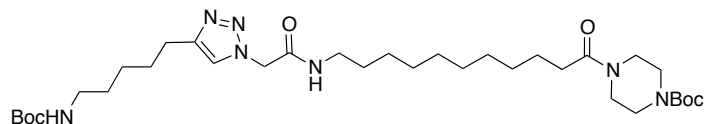

$^1\text{H}$  NMR (500 MHz,  $\text{DMSO-}d_6$ )  $\delta$  8.26 (t, 1H,  $J = 5.5$  Hz), 7.76 (s, 1H), 6.79 (t, 1H,  $J = 6.0$  Hz), 4.98 (s, 2H), 3.41-3.25 (m, 10H), 3.08 (q, 2H,  $J = 7.5$  Hz), 2.90 (q, 2H,  $J = 6.5$  Hz), 2.60 (t, 2H,  $J = 7.5$ ), 2.29 (t, 2H,  $J = 7.5$ ), 1.40-1.36 (m, 30H), 1.24 (m, 16H)

$^{13}\text{C}$  NMR (126 MHz,  $\text{DMSO-}d_6$ )  $\delta$  171.5, 165.9, 156.2, 154.5, 147.2, 123.9, 79.8, 77.9, 55.6, 52.2, 45.3, 41.4, 39.4, 33.0, 30.0, 29.7, 29.6(2), 29.5, 29.4(2), 28.9, 28.7, 27.0, 26.6, 25.6, 25.4

MS (MALDI,  $m/z$ ) calcd for  $\text{C}_{34}\text{H}_{62}\text{N}_7\text{O}_6$  ( $\text{M}+\text{H}$ ) $^+$  664.48, found 664.49

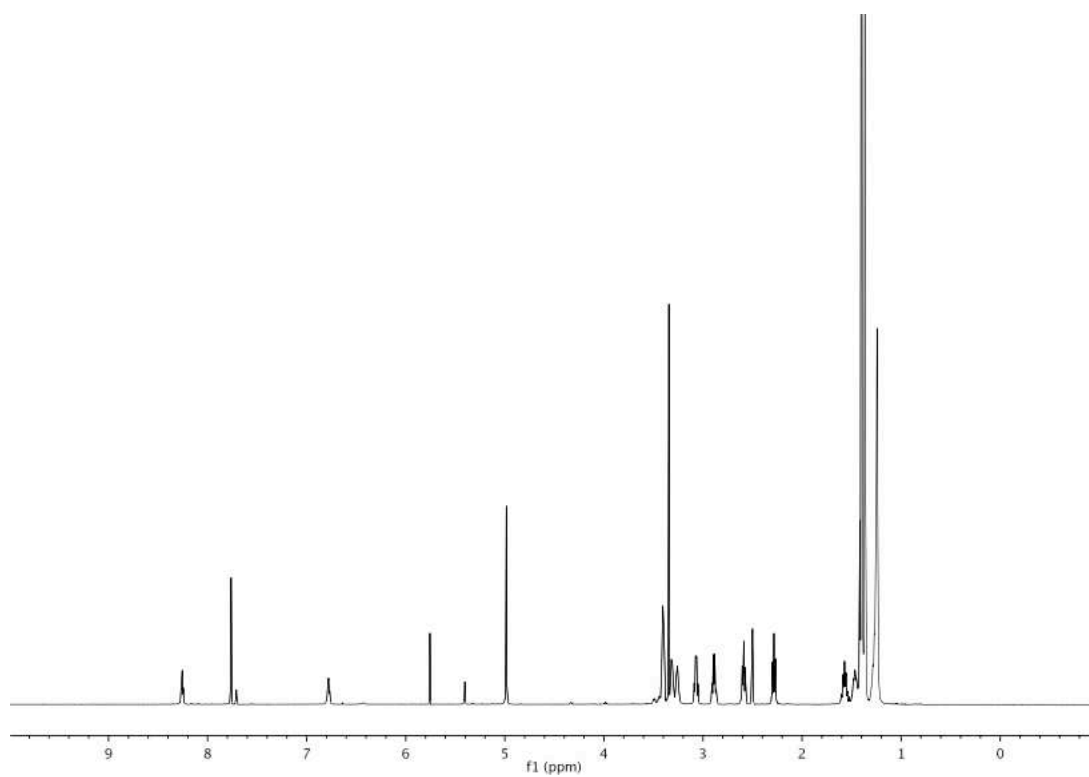 $^1\text{H}$  NMR of 10\_KG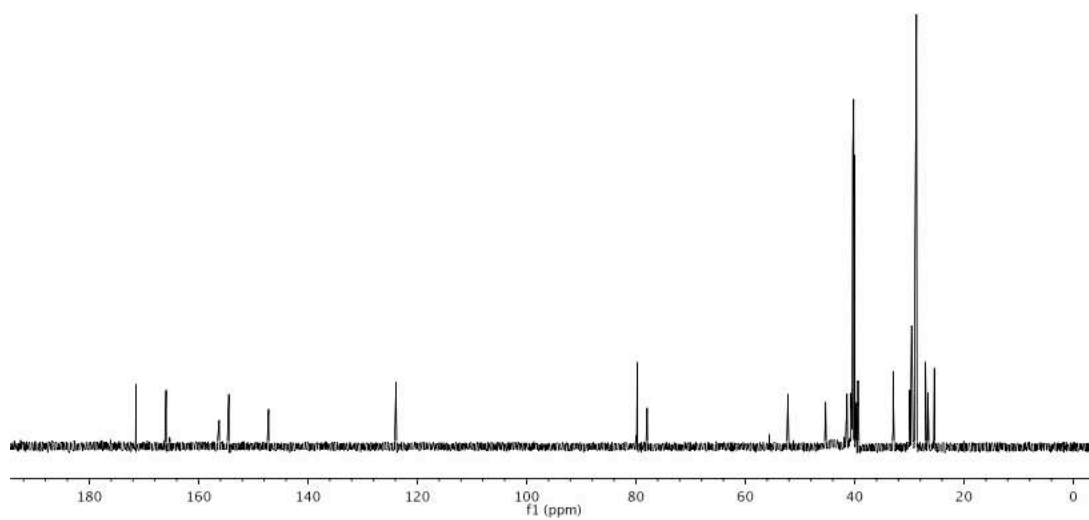 $^{13}\text{C}$  NMR of 10\_KG

**Compound 10\_SM**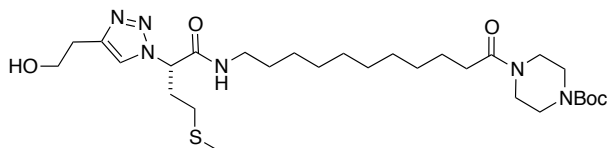

<sup>1</sup>H NMR (500 MHz, DMSO-*d*<sub>6</sub>) δ 8.46 (t, 1H, J = 5.5 Hz), 7.94 (s, 1H), 5.30 (m, 1H), 4.69 (t, 1H, J = 6.0 Hz), 3.64 (dd, 2H), 3.41-3.34 (m, 10H), 3.10-3.00 (m, 2H), 2.76 (t, 2H, J = 7.5 Hz), 2.29-2.26 (m, 6H), 2.03 (s, 3H), 1.40 (m, 11H), 1.22 (m, 12H)

<sup>13</sup>C NMR (126 MHz, DMSO-*d*<sub>6</sub>) δ 171.5, 167.9, 154.5, 145.1, 122.1, 79.8, 62.2, 61.0, 55.6, 41.4, 40.7, 39.4, 33.0, 32.3, 29.9, 29.6(3), 29.5, 29.4, 29.3, 28.7, 15.1

MS (MALDI, m/z) calcd for C<sub>29</sub>H<sub>53</sub>N<sub>6</sub>O<sub>5</sub>S (M+H)<sup>+</sup> 597.38, found 597.60

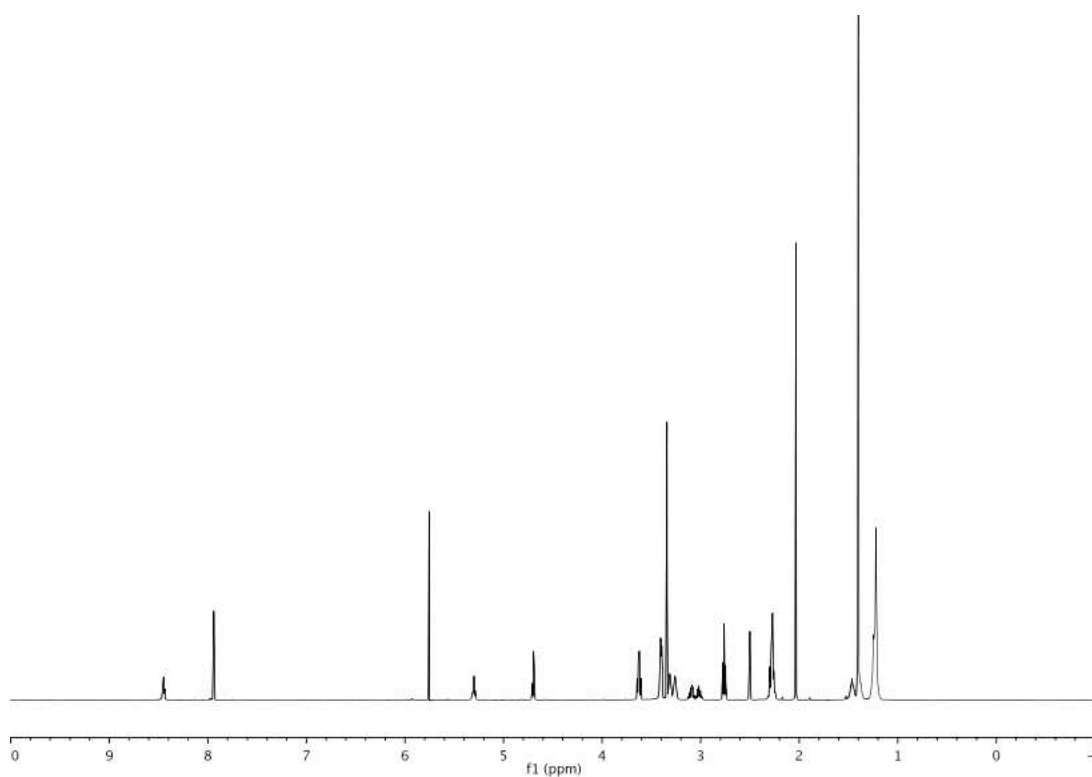

<sup>1</sup>H NMR of 10\_SM

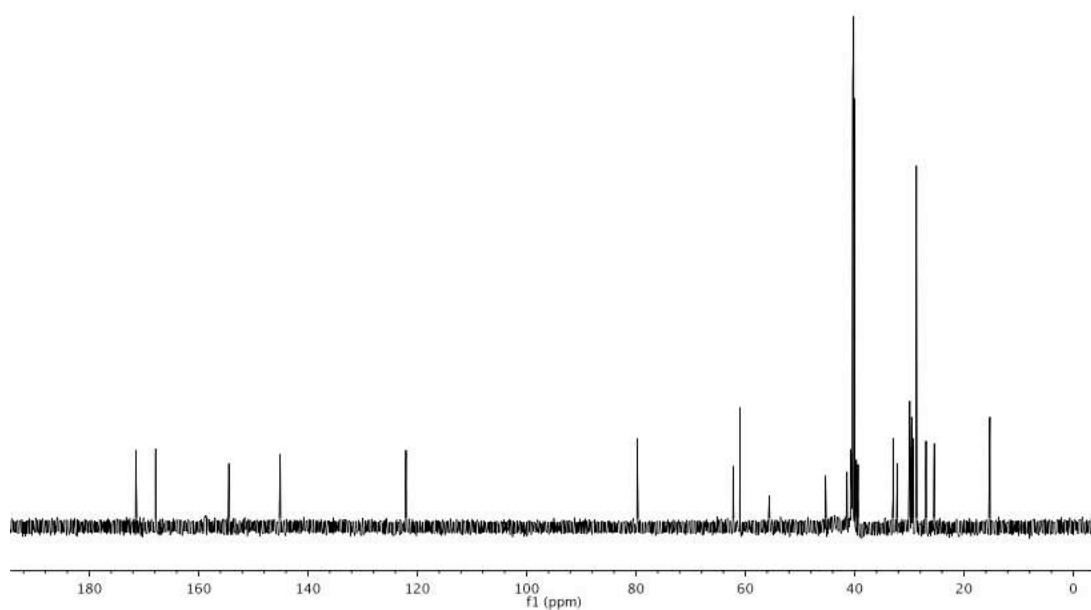 $^{13}\text{C}$  NMR of **10\_SM****Compound 10\_KS**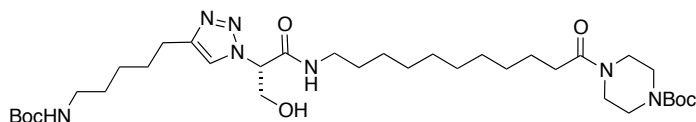

$^1\text{H}$  NMR (500 MHz,  $\text{DMSO-}d_6$ )  $\delta$  8.40 (t, 1H,  $J = 5.5$  Hz), 7.86 (s, 1H), 6.79 (t, 1H,  $J = 6.0$  Hz), 5.28-5.22 (m, 2H), 3.92 (t, 2H,  $J = 6.0$  Hz), 3.41-3.25 (m, 10H), 3.06 (q, 2H,  $J = 7.5$  Hz), 2.97 (q, 2H,  $J = 7.5$  Hz), 2.60 (t, 2H,  $J = 6.0$  Hz), 2.29 (t, 2H,  $J = 6.0$  Hz), 1.59 (m, 2H), 1.40 (m, 28H), 1.24 (m, 16H)

$^{13}\text{C}$  NMR (126 MHz,  $\text{DMSO-}d_6$ )  $\delta$  171.5, 166.9, 156.2, 154.5, 147.0, 121.7, 79.8, 78.0, 65.5, 62.1, 45.3, 41.4, 39.4, 33.0, 30.0, 29.6(3), 29.5, 29.4, 29.3, 28.9, 28.7, 26.9, 26.7, 25.8, 25.4

MS (MALDI,  $m/z$ ) calcd for  $\text{C}_{35}\text{H}_{64}\text{N}_7\text{O}_7$  ( $\text{M}+\text{H}$ ) $^+$  694.49, found 694.51

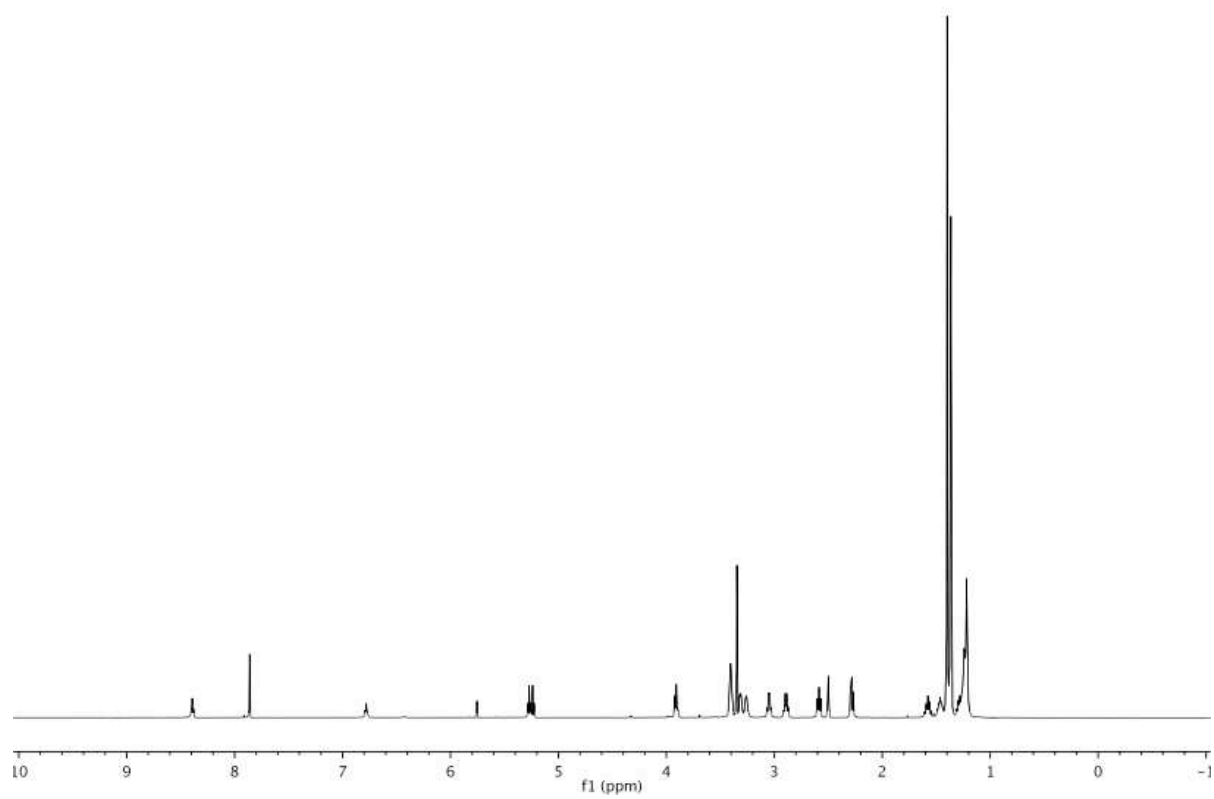 $^1\text{H}$  NMR of 10\_KS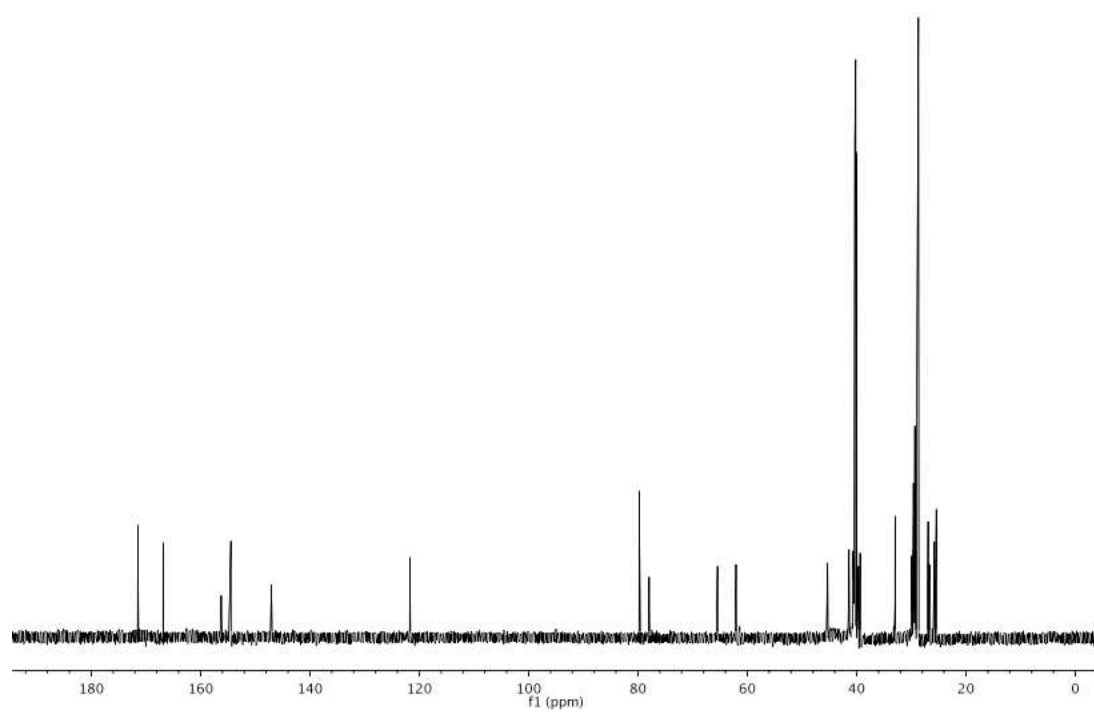 $^{13}\text{C}$  NMR of 10\_KS

## Compound 10\_RI

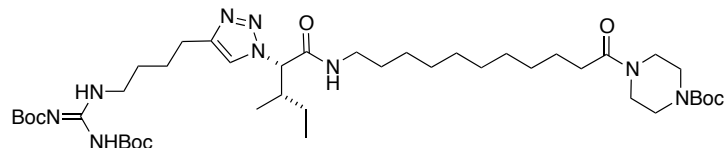

$^1\text{H}$  NMR (500 MHz,  $\text{DMSO-}d_6$ )  $\delta$  11.50 (s, 1H), 8.54 (t, 1H,  $J = 5.5$  Hz), 8.30 (t, 1H,  $J = 5.5$  Hz), 7.90 (s, 1H), 4.96 (d, 1H,  $J = 11.0$  Hz), 3.40-3.25 (m, 10H), 3.16 (m, 1H), 3.10 (m, 1H), 2.64 (t, 2H,  $J = 6.0$  Hz), 2.29 (t, 2H,  $J = 6.0$  Hz), 2.19 (m, 1H), 1.60 (m, 2H), 1.51 (m, 15H), 1.39 (m, 22H), 1.20 (m, 12H), 0.95 (d, 3H,  $J = 6.5$  Hz), 0.75 (t, 3H,  $J = 7.0$  Hz)

$^{13}\text{C}$  NMR (126 MHz,  $\text{DMSO-}d_6$ )  $\delta$  171.4, 168.0, 163.8, 155.9, 154.4, 152.8, 147.4, 121.1, 83.5, 79.8, 78.7, 67.8, 55.6, 45.3, 41.4, 39.2, 37.2, 33.0, 29.6(2), 29.5, 29.3(2), 28.8, 28.7(2), 28.3, 26.9, 25.4(2), 25.0, 15.7, 10.5

MS (MALDI,  $m/z$ ) calcd for  $\text{C}_{43}\text{H}_{78}\text{N}_9\text{O}_8$  ( $\text{M}+\text{H}$ ) $^+$  848.60, found 848.57

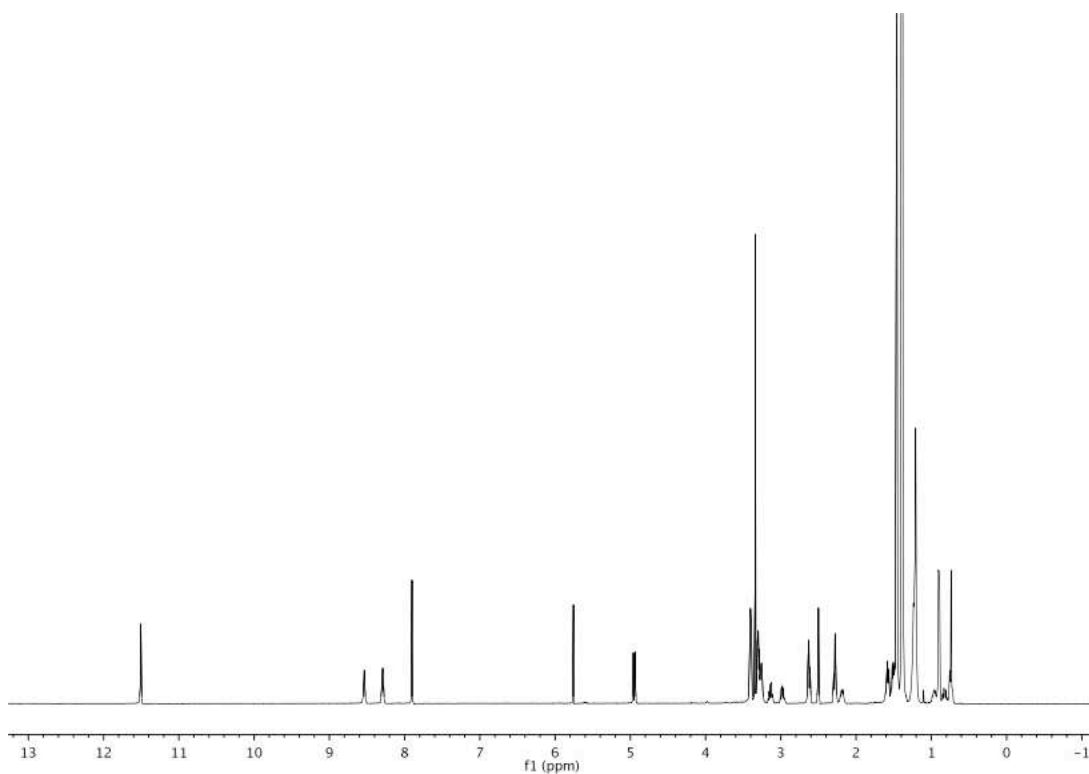

$^1\text{H}$  NMR of 10\_RI

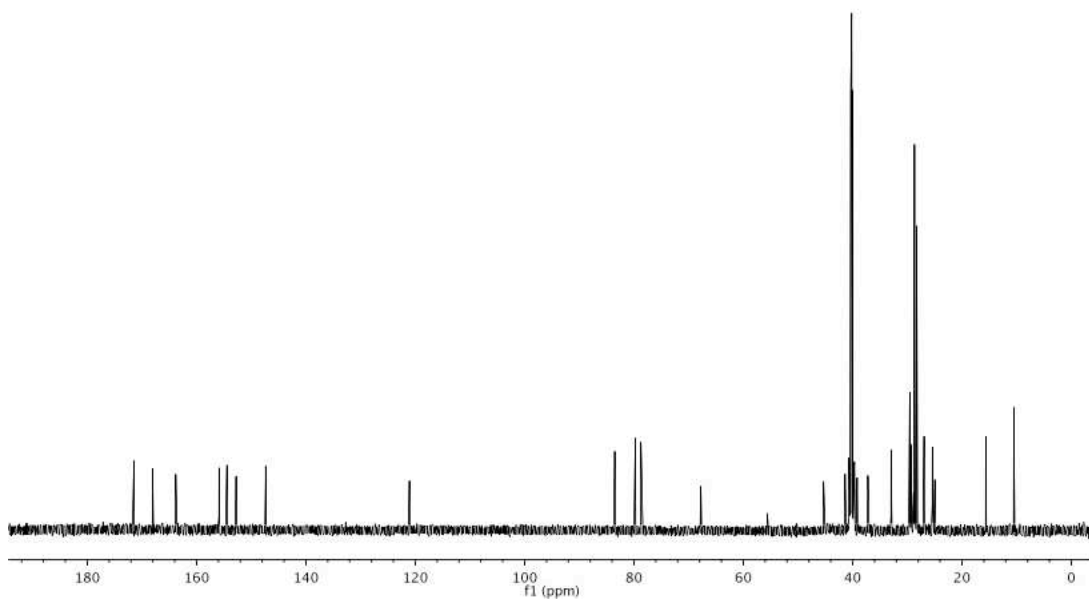 $^{13}\text{C}$  NMR of **10\_RI****Compound 10\_GT**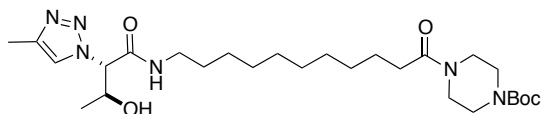

$^1\text{H}$  NMR (500 MHz,  $\text{DMSO}-d_6$ )  $\delta$  8.49 (t, 1H,  $J = 5.5$  Hz), 7.85 (s, 1H), 5.13 (d, 1H,  $J = 6.0$  Hz), 5.012 (d, 1H,  $J = 6.0$  Hz), 4.23 (m, 1H), 3.40-3.26 (m, 10H), 3.11-2.98 (m, 2H), 2.29 (t, 2H,  $J = 7.5$  Hz), 2.22 (s, 3H), 1.47 (m, 14H), 1.24 (m, 12H), 1.06 (d, 3H,  $J = 6.0$  Hz)

$^{13}\text{C}$  NMR (126 MHz,  $\text{DMSO}-d_6$ )  $\delta$  171.5, 167.2, 154.5, 141.9, 122.3, 79.8, 69.8, 67.1, 45.3, 41.4, 39.3, 33.0, 29.6(3), 29.5, 29.3(2), 28.7, 27.0, 25.4, 20.9, 11.3

MS (MALDI,  $m/z$ ) calcd for  $\text{C}_{27}\text{H}_{49}\text{N}_6\text{O}_5$  ( $\text{M}+\text{H}$ ) $^+$  537.38, found 537.49

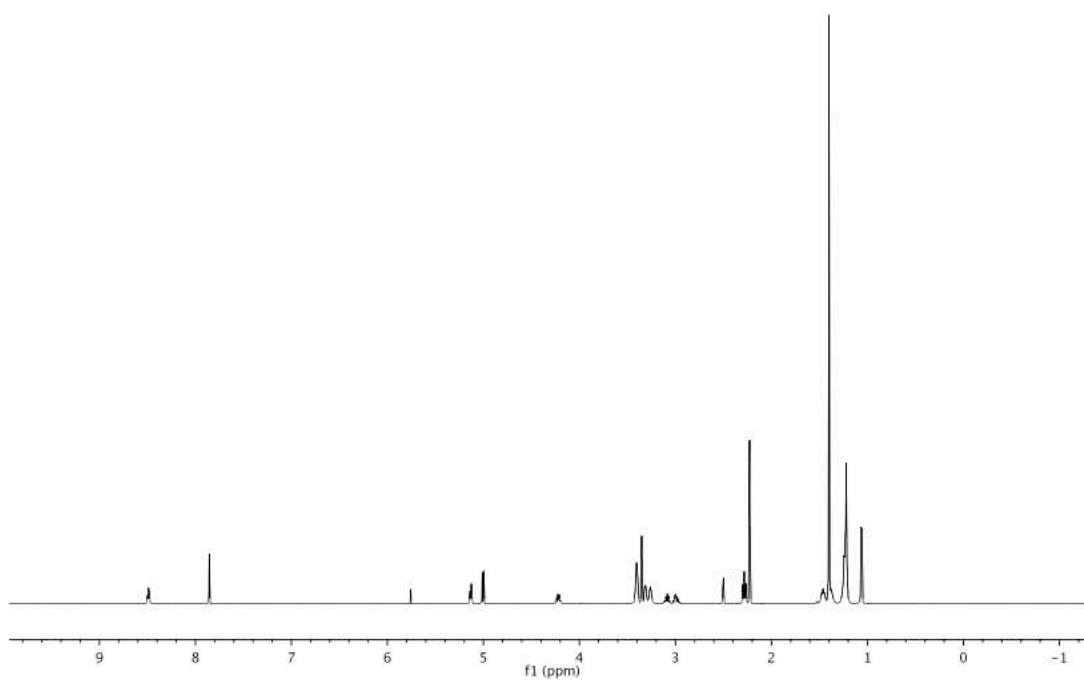 $^1\text{H}$  NMR of 10\_GT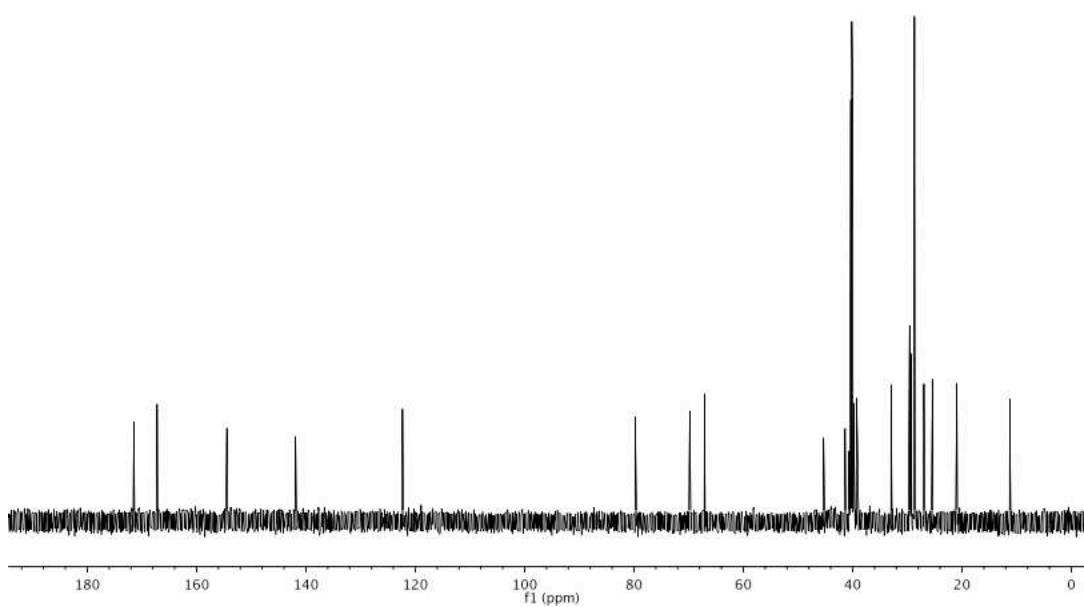 $^{13}\text{C}$  NMR of 10\_GT



## D. General Procedure and Preparation of Bivalent Mimics

General syntheses for bivalent mimics were modified from the published papers.<sup>6,8</sup> Compounds **10** (1.0 eq.) were treated with 50% TFA in CH<sub>2</sub>Cl<sub>2</sub> for 12h at 25 °C and then the solvent was removed. The resulting residue was dissolved in THF (0.04 M), and then tag **11** (1.0 eq) and K<sub>2</sub>CO<sub>3</sub> (4.0 eq.) were added. The suspension was stirred for 18 h at 25 °C and then the solvent was removed. Crude product **12** was used for the next step without further purification. The resulting crude product **12** was dissolved in DMSO (0.04 M), and then another deprotected compound **10'** and K<sub>2</sub>CO<sub>3</sub> (4.0 eq.) were added. The suspension was stirred for 10 – 14 days at 25 or 50 °C and the reaction was monitored by analytical HPLC. After the starting material was consumed, the mixture was lyophilized to remove DMSO. The materials were re-dissolved in 1:1 mixture of H<sub>2</sub>O/CH<sub>3</sub>CN, and then purified by preparative HPLC to yield the final products **1**.

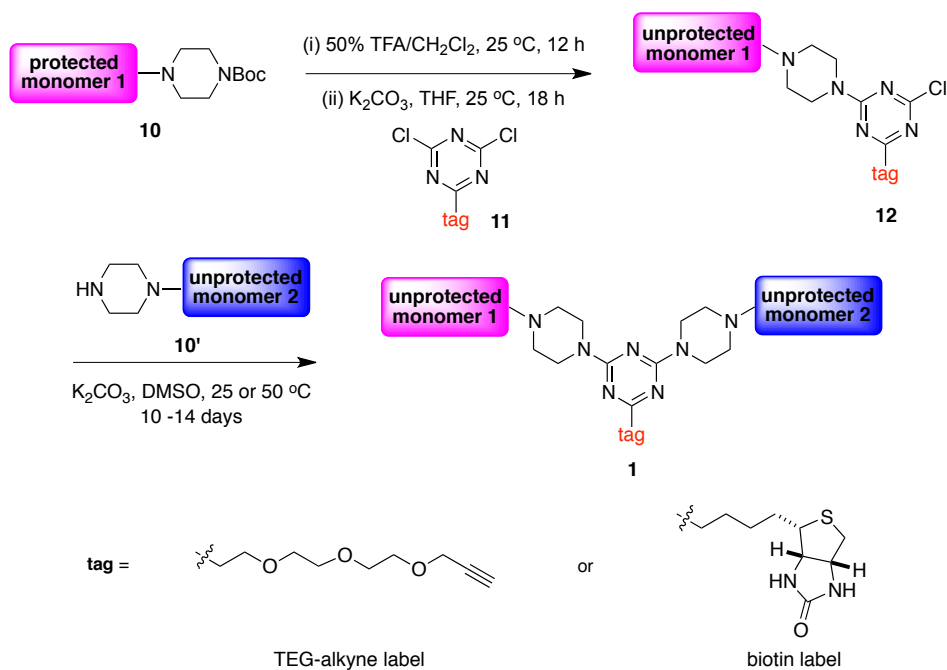

**E. Table S2. Characterization of Compounds with TEG-alkyne Label.**

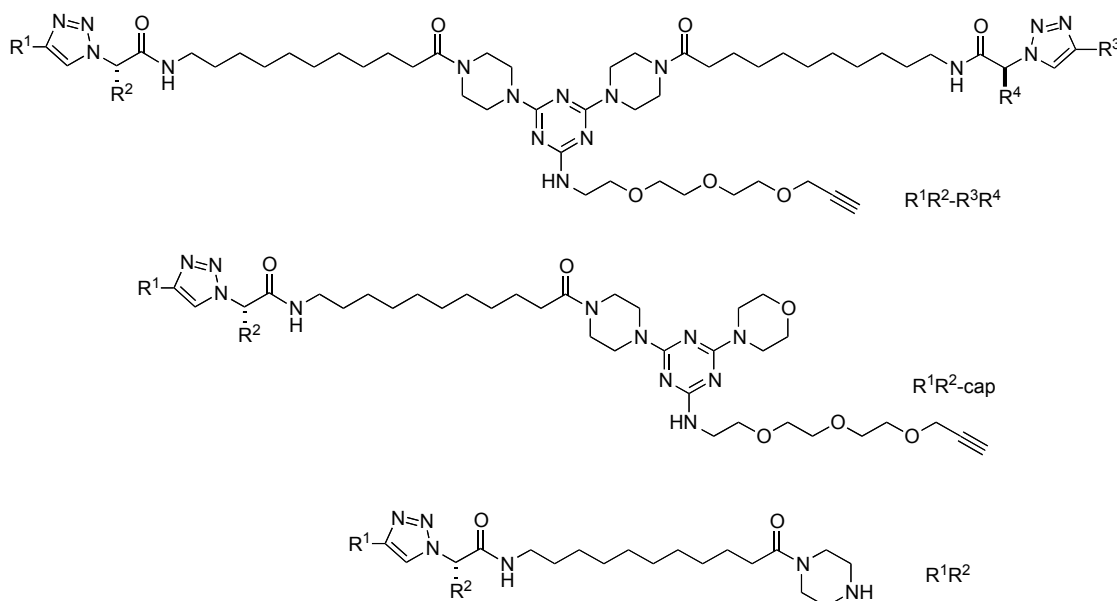

|    | compound code | sequence ( $R^1R^2-R^3R^4$ ) | SEDEX purity (%) | retention time (min) | chemical formula             | $[M+H]^+$ calculated | $[M+H]^+$ found |
|----|---------------|------------------------------|------------------|----------------------|------------------------------|----------------------|-----------------|
| 1  | KB1365        | KI-KI                        | 100              | 19.0                 | $C_{68}H_{121}N_{18}O_7$     | 1302.0               | 1302.0          |
| 2  | KB1366        | KI-KG                        | 100              | 17.0                 | $C_{64}H_{113}N_{18}O_7$     | 1245.7               | 1245.9          |
| 3  | KB1367        | KI-KE                        | 100              | 17.2                 | $C_{67}H_{117}N_{18}O_9$     | 1317.9               | 1317.9          |
| 4  | KB1368        | KI-KS                        | 100              | 16.6                 | $C_{65}H_{115}N_{18}O_8$     | 1275.9               | 1275.8          |
| 5  | KB1369        | KI-GT                        | 100              | 16.7                 | $C_{62}H_{108}N_{17}O_8$     | 1218.9               | 1218.9          |
| 6  | KB1370        | KI-RI                        | 100              | 19.6                 | $C_{68}H_{121}N_{20}O_7$     | 1330.0               | 1330.0          |
| 7  | KB1371        | KI-SM                        | 100              | 17.0                 | $C_{64}H_{112}N_{17}O_8S$    | 1278.9               | 1278.9          |
| 8  | KB1372        | KG-KG                        | 100              | 15.6                 | $C_{60}H_{105}N_{18}O_7$     | 1189.8               | 1189.8          |
| 9  | KB1373        | KG-KE                        | 100              | 14.4                 | $C_{63}H_{109}N_{18}O_9$     | 1261.9               | 1262.0          |
| 10 | KB1374        | KG-KS                        | 100              | 13.2                 | $C_{61}H_{107}N_{18}O_8$     | 1219.9               | 1219.8          |
| 11 | KB1375        | KG-GT                        | 100              | 14.8                 | $C_{58}H_{100}N_{17}O_8$     | 1162.8               | 1162.7          |
| 12 | KB1376        | KG-RI                        | 100              | 17.6                 | $C_{64}H_{113}N_{20}O_7$     | 1273.9               | 1273.8          |
| 13 | KB1377        | KG-SM                        | 100              | 16.9                 | $C_{60}H_{104}N_{17}O_8S$    | 1222.8               | 1222.8          |
| 14 | KB1378        | KE-KE                        | 100              | 15.0                 | $C_{66}H_{113}N_{18}O_{11}$  | 1333.9               | 1333.9          |
| 15 | KB1379        | KE-KS                        | 91               | 14.9                 | $C_{64}H_{111}N_{18}O_{10}$  | 1291.9               | 1291.9          |
| 16 | KB1380        | KE-GT                        | 100              | 16.7                 | $C_{61}H_{104}N_{17}O_{10}$  | 1234.8               | 1234.7          |
| 17 | KB1381        | KE-RI                        | 100              | 17.1                 | $C_{67}H_{117}N_{20}O_9$     | 1345.9               | 1345.8          |
| 18 | KB1382        | KE-SM                        | 100              | 16.7                 | $C_{63}H_{108}N_{17}O_{10}S$ | 1294.8               | 1294.8          |

|    |        |       |     |      |                                                                                |        |        |
|----|--------|-------|-----|------|--------------------------------------------------------------------------------|--------|--------|
| 19 | KB1383 | KS-KS | 100 | 14.7 | C <sub>62</sub> H <sub>109</sub> N <sub>18</sub> O <sub>9</sub>                | 1249.9 | 1249.9 |
| 20 | KB1384 | KS-GT | 100 | 14.4 | C <sub>59</sub> H <sub>102</sub> N <sub>17</sub> O <sub>9</sub>                | 1192.8 | 1192.8 |
| 21 | KB1385 | KS-RI | 100 | 17.3 | C <sub>65</sub> H <sub>115</sub> N <sub>20</sub> O <sub>8</sub>                | 1303.9 | 1303.9 |
| 22 | KB1386 | KS-SM | 100 | 17.0 | C <sub>61</sub> H <sub>106</sub> N <sub>17</sub> O <sub>9</sub> S              | 1252.8 | 1252.8 |
| 23 | KB1387 | GT-GT | 100 | 15.3 | C <sub>56</sub> H <sub>95</sub> N <sub>16</sub> O <sub>9</sub>                 | 1135.7 | 1135.6 |
| 24 | KB1388 | GT-RI | 100 | 18.8 | C <sub>62</sub> H <sub>108</sub> N <sub>19</sub> O <sub>8</sub>                | 1246.9 | 1246.9 |
| 25 | KB1389 | GT-SM | 98  | 18.1 | C <sub>58</sub> H <sub>99</sub> N <sub>16</sub> O <sub>9</sub> S               | 1195.8 | 1195.6 |
| 26 | KB1390 | RI-RI | 100 | 18.9 | C <sub>68</sub> H <sub>121</sub> N <sub>22</sub> O <sub>7</sub>                | 1358.0 | 1357.9 |
| 27 | KB1391 | RI-SM | 100 | 19.7 | C <sub>64</sub> H <sub>112</sub> N <sub>19</sub> O <sub>8</sub> S              | 1306.9 | 1306.9 |
| 28 | KB1392 | SM-SM | 100 | 18.8 | C <sub>60</sub> H <sub>103</sub> N <sub>16</sub> O <sub>9</sub> S <sub>2</sub> | 1255.8 | 1255.7 |
| 29 | KB1393 | SM    | 100 | 15.7 | C <sub>24</sub> H <sub>45</sub> N <sub>6</sub> O <sub>3</sub> S                | 497.3  | 497.1  |
| 30 | KB1394 | RI    | 100 | 11.3 | C <sub>28</sub> H <sub>54</sub> N <sub>9</sub> O <sub>2</sub>                  | 548.4  | 548.3  |
| 31 | KB1395 | KI    | 100 | 11.5 | C <sub>28</sub> H <sub>54</sub> N <sub>7</sub> O <sub>2</sub>                  | 520.4  | 520.2  |
| 32 | KB1396 | KG    | 100 | 10.0 | C <sub>24</sub> H <sub>46</sub> N <sub>7</sub> O <sub>2</sub>                  | 464.4  | 464.1  |
| 33 | KB1397 | KE    | 100 | 10.1 | C <sub>27</sub> H <sub>50</sub> N <sub>7</sub> O <sub>4</sub>                  | 536.4  | 536.2  |
| 34 | KB1398 | KS    | 100 | 8.6  | C <sub>25</sub> H <sub>48</sub> N <sub>7</sub> O <sub>3</sub>                  | 494.4  | 494.1  |
| 35 | KB1399 | GT    | 100 | 9.7  | C <sub>22</sub> H <sub>41</sub> N <sub>6</sub> O <sub>3</sub>                  | 437.3  | 437.1  |
| 36 | KB1445 | TG-TG | 98  | 14.5 | C <sub>56</sub> H <sub>95</sub> N <sub>16</sub> O <sub>9</sub>                 | 1135.8 | 1135.5 |
| 37 | KB1446 | TG-MS | 100 | 15.8 | C <sub>58</sub> H <sub>99</sub> N <sub>16</sub> O <sub>9</sub> S               | 1195.8 | 1195.6 |
| 38 | KB1447 | TG-EK | 96  | 13.8 | C <sub>61</sub> H <sub>104</sub> N <sub>17</sub> O <sub>10</sub>               | 1234.8 | 1234.6 |
| 39 | KB1448 | TG-GK | 100 | 14.2 | C <sub>58</sub> H <sub>100</sub> N <sub>17</sub> O <sub>8</sub>                | 1162.8 | 1162.5 |
| 40 | KB1449 | TG-SK | 100 | 14.4 | C <sub>59</sub> H <sub>102</sub> N <sub>17</sub> O <sub>9</sub>                | 1192.8 | 1192.8 |
| 41 | KB1450 | TG-IK | 100 | 16.3 | C <sub>62</sub> H <sub>108</sub> N <sub>17</sub> O <sub>8</sub>                | 1218.9 | 1218.6 |
| 42 | KB1451 | TG-IR | 94  | 17.1 | C <sub>62</sub> H <sub>108</sub> N <sub>19</sub> O <sub>8</sub>                | 1246.9 | 1246.7 |
| 43 | KB1452 | MS-MS | 90  | 17.2 | C <sub>60</sub> H <sub>103</sub> N <sub>16</sub> O <sub>9</sub> S <sub>2</sub> | 1255.8 | 1255.8 |
| 44 | KB1453 | MS-EK | 93  | 14.9 | C <sub>63</sub> H <sub>108</sub> N <sub>17</sub> O <sub>10</sub> S             | 1294.8 | 1294.8 |
| 45 | KB1454 | MS-GK | 100 | 16.8 | C <sub>60</sub> H <sub>104</sub> N <sub>17</sub> O <sub>8</sub> S              | 1222.8 | 1222.6 |
| 46 | KB1455 | MS-SK | 100 | 14.9 | C <sub>61</sub> H <sub>106</sub> N <sub>17</sub> O <sub>9</sub> S              | 1252.8 | 1252.7 |
| 47 | KB1456 | MS-IK | 92  | 17.7 | C <sub>64</sub> H <sub>112</sub> N <sub>17</sub> O <sub>8</sub> S              | 1278.9 | 1278.7 |
| 48 | KB1457 | MS-IR | 100 | 17.8 | C <sub>64</sub> H <sub>112</sub> N <sub>19</sub> O <sub>8</sub> S              | 1306.9 | 1306.7 |
| 49 | KB1458 | EK-EK | 100 | 12.9 | C <sub>66</sub> H <sub>113</sub> N <sub>18</sub> O <sub>11</sub>               | 1333.9 | 1333.8 |
| 50 | KB1459 | EK-GK | 97  | 13.0 | C <sub>63</sub> H <sub>109</sub> N <sub>18</sub> O <sub>9</sub>                | 1261.9 | 1261.9 |
| 51 | KB1460 | EK-SK | 100 | 12.5 | C <sub>64</sub> H <sub>111</sub> N <sub>18</sub> O <sub>10</sub>               | 1291.9 | 1292.0 |
| 52 | KB1461 | EK-IK | 84  | 15.7 | C <sub>67</sub> H <sub>117</sub> N <sub>18</sub> O <sub>9</sub>                | 1317.9 | 1318.0 |
| 53 | KB1462 | EK-IR | 98  | 17.0 | C <sub>67</sub> H <sub>117</sub> N <sub>20</sub> O <sub>9</sub>                | 1345.9 | 1346.0 |
| 54 | KB1463 | GK-GK | 100 | 13.4 | C <sub>60</sub> H <sub>105</sub> N <sub>18</sub> O <sub>7</sub>                | 1189.8 | 1190.1 |

|    |        |        |     |      |                            |        |        |
|----|--------|--------|-----|------|----------------------------|--------|--------|
| 55 | KB1464 | GK-SK  | 95  | 13.5 | $C_{61}H_{106}N_{18}O_8$   | 1218.8 | 1218.7 |
| 56 | KB1465 | GK-IK  | 99  | 15.4 | $C_{64}H_{113}N_{18}O_7$   | 1245.9 | 1245.7 |
| 57 | KB1466 | GK-IR  | 96  | 15.6 | $C_{64}H_{113}N_{20}O_7$   | 1273.9 | 1273.8 |
| 58 | KB1467 | SK-SK  | 100 | 12.9 | $C_{62}H_{109}N_{18}O_9$   | 1249.9 | 1249.7 |
| 59 | KB1468 | SK-IK  | 100 | 14.8 | $C_{65}H_{115}N_{18}O_8$   | 1275.9 | 1275.7 |
| 60 | KB1469 | SK-IR  | 89  | 15.4 | $C_{65}H_{115}N_{20}O_8$   | 1303.9 | 1303.7 |
| 61 | KB1470 | IK-IK  | 100 | 16.5 | $C_{68}H_{121}N_{18}O_7$   | 1302.0 | 1302.0 |
| 62 | KB1471 | IK-IR  | 100 | 17.8 | $C_{68}H_{121}N_{20}O_7$   | 1330.0 | 1329.8 |
| 63 | KB1472 | IR-IR  | 100 | 17.6 | $C_{68}H_{121}N_{22}O_7$   | 1358.0 | 1357.7 |
| 64 | KB1473 | TG     | 100 | 8.9  | $C_{22}H_{41}N_6O_3$       | 437.3  | 437.1  |
| 65 | KB1474 | MS     | 97  | 11.1 | $C_{24}H_{45}N_6O_3S$      | 497.3  | 497.2  |
| 66 | KB1475 | EK     | 100 | 8.6  | $C_{27}H_{50}N_7O_4$       | 536.4  | 536.3  |
| 67 | KB1476 | GK     | 100 | 8.8  | $C_{24}H_{46}N_7O_2$       | 464.4  | 464.2  |
| 68 | KB1477 | SK     | 94  | 8.0  | $C_{25}H_{48}N_7O_3$       | 494.4  | 494.2  |
| 69 | KB1478 | IK     | 94  | 11.4 | $C_{28}H_{54}N_7O_2$       | 520.8  | 520.3  |
| 70 | KB1479 | IR     | 100 | 11.4 | $C_{28}H_{54}N_9O_2$       | 548.4  | 548.4  |
| 71 | KB1480 | TG-CAP | 100 | 13.6 | $C_{38}H_{64}N_{11}O_7$    | 786.5  | 786.3  |
| 72 | KB1481 | MS-CAP | 100 | 15.8 | $C_{40}H_{68}N_{11}O_7S$   | 846.5  | 845.3  |
| 73 | KB1482 | EK-CAP | 100 | 10.9 | $C_{43}H_{73}N_{12}O_8$    | 885.6  | 885.2  |
| 74 | KB1483 | GK-CAP | 100 | 14.2 | $C_{40}H_{69}N_{12}O_6$    | 813.5  | 813.3  |
| 75 | KB1484 | SK-CAP | 99  | 12.3 | $C_{41}H_{71}N_{12}O_7$    | 843.6  | 843.3  |
| 76 | KB1485 | IK-CAP | 100 | 16.1 | $C_{44}H_{77}N_{12}O_6$    | 869.6  | 869.4  |
| 77 | KB1486 | IR-CAP | 100 | 18.0 | $C_{44}H_{77}N_{14}O_6$    | 897.6  | 897.4  |
| 78 | KB1551 | KI-IK  | 100 | 17.5 | $C_{68}H_{121}N_{18}O_7$   | 1302.0 | 1301.8 |
| 79 | KB1552 | KI-GK  | 100 | 15.6 | $C_{64}H_{112}N_{18}NaO_7$ | 1267.9 | 1267.8 |
| 80 | KB1553 | KI-EK  | 100 | 16.9 | $C_{67}H_{117}N_{18}O_9$   | 1317.9 | 1318.1 |
| 81 | KB1554 | KI-SK  | 100 | 15.1 | $C_{65}H_{115}N_{18}O_8$   | 1275.9 | 1275.6 |
| 82 | KB1555 | KI-TG  | 100 | 16.9 | $C_{62}H_{108}N_{17}O_8$   | 1218.9 | 1219.0 |
| 83 | KB1556 | KI-MS  | 100 | 18.7 | $C_{64}H_{112}N_{17}O_8S$  | 1278.9 | 1278.9 |
| 84 | KB1557 | KG-IK  | 100 | 17.0 | $C_{64}H_{113}N_{18}O_7$   | 1245.9 | 1246.0 |
| 85 | KB1558 | KG-GK  | 100 | 14.7 | $C_{60}H_{104}N_{18}NaO_7$ | 1211.8 | 1211.8 |
| 86 | KB1559 | KG-EK  | 100 | 14.6 | $C_{63}H_{109}N_{18}O_9$   | 1261.9 | 1261.9 |
| 87 | KB1560 | KG-SK  | 100 | 14.1 | $C_{61}H_{107}N_{18}O_8$   | 1219.9 | 1219.8 |
| 88 | KB1561 | KG-TG  | 100 | 14.1 | $C_{58}H_{100}N_{17}O_8$   | 1162.8 | 1162.9 |
| 89 | KB1562 | KG-IR  | 100 | 18.0 | $C_{64}H_{113}N_{20}O_7$   | 1273.9 | 1274.1 |
| 90 | KB1563 | KG-MS  | 100 | 16.6 | $C_{60}H_{104}N_{17}O_8S$  | 1222.8 | 1222.6 |

|     |        |        |     |      |                               |        |           |
|-----|--------|--------|-----|------|-------------------------------|--------|-----------|
| 91  | KB1564 | KE-IK  | 100 | 16.4 | $C_{67}H_{117}N_{18}O_9$      | 1317.9 | 1318.1    |
| 92  | KB1565 | KE-GK  | 99  | 13.5 | $C_{63}H_{109}N_{18}O_9$      | 1261.9 | 1261.8    |
| 93  | KB1566 | KE-EK  | 100 | 15.0 | $C_{66}H_{113}N_{18}O_{11}$   | 1333.9 | 1333.9    |
| 94  | KB1567 | KE-SK  | 100 | 13.2 | $C_{64}H_{110}N_{18}NaO_{10}$ | 1313.9 | 1313.9    |
| 95  | KB1568 | KE-TG  | 87  | 14.3 | $C_{61}H_{104}N_{17}O_{10}$   | 1234.8 | 1234.9    |
| 96  | KB1569 | KE-IR  | 99  | 16.7 | $C_{67}H_{117}N_{20}O_9$      | 1345.9 | 1346.0    |
| 97  | KB1570 | KE-MS  | 100 | 15.4 | $C_{63}H_{108}N_{17}O_{10}S$  | 1294.8 | 1294.6    |
| 98  | KB1571 | KS-IK  | 100 | 16.0 | $C_{65}H_{115}N_{18}O_8$      | 1275.9 | 1275.8    |
| 99  | KB1572 | KS-GK  | 97  | 13.6 | $C_{61}H_{107}N_{18}O_8$      | 1219.9 | 1219.9    |
| 100 | KB1573 | KS-EK  | 100 | 14.9 | $C_{64}H_{111}N_{18}O_{10}$   | 1291.9 | 1291.9    |
| 101 | KB1574 | KS-SK  | 100 | 14.9 | $C_{62}H_{109}N_{18}O_9$      | 1249.9 | 1249.8    |
| 102 | KB1575 | KS-TG  | 100 | 14.6 | $C_{59}H_{102}N_{17}O_9$      | 1192.8 | 1192.7429 |
| 103 | KB1576 | KS-MS  | 99  | 15.4 | $C_{61}H_{106}N_{17}O_9S$     | 1252.8 | 1252.5    |
| 104 | KB1577 | GT-IK  | 100 | 17.6 | $C_{62}H_{108}N_{17}O_8$      | 1218.9 | 1218.7    |
| 105 | KB1578 | GT-GK  | 100 | 14.4 | $C_{58}H_{100}N_{17}O_8$      | 1162.8 | 1162.9    |
| 106 | KB1579 | GT-EK  | 100 | 16.2 | $C_{61}H_{104}N_{17}O_{10}$   | 1234.8 | 1234.8    |
| 107 | KB1580 | GT-SK  | 100 | 14.4 | $C_{59}H_{102}N_{17}O_9$      | 1192.8 | 1192.9    |
| 108 | KB1581 | GT-TG  | 100 | 14.9 | $C_{56}H_{95}N_{16}O_9$       | 1135.7 | 1135.9    |
| 109 | KB1582 | GT-IR  | 100 | 17.1 | $C_{62}H_{108}N_{19}O_8$      | 1246.9 | 1247.0    |
| 110 | KB1583 | GT-MS  | 100 | 16.4 | $C_{58}H_{99}N_{16}O_9S$      | 1195.8 | 1195.7    |
| 111 | KB1584 | RI-IK  | 100 | 19.3 | $C_{68}H_{121}N_{20}O_7$      | 1330.0 | 1330.0    |
| 112 | KB1585 | RI-GK  | 100 | 16.5 | $C_{64}H_{113}N_{20}O_7$      | 1273.9 | 1273.9    |
| 113 | KB1586 | RI-EK  | 100 | 17.3 | $C_{67}H_{117}N_{20}O_9$      | 1345.9 | 1346.1    |
| 114 | KB1587 | RI-SK  | 100 | 15.7 | $C_{65}H_{115}N_{20}O_8$      | 1303.9 | 1304.1    |
| 115 | KB1588 | RI-TG  | 100 | 17.2 | $C_{62}H_{108}N_{19}O_8$      | 1246.9 | 1246.6    |
| 116 | KB1589 | RI-MS  | 100 | 18.2 | $C_{64}H_{112}N_{19}O_8S$     | 1306.9 | 1306.6    |
| 117 | KB1590 | SM-IK  | 100 | 17.8 | $C_{64}H_{112}N_{17}O_8S$     | 1278.9 | 1278.7    |
| 118 | KB1591 | SM-GK  | 100 | 15.7 | $C_{60}H_{104}N_{17}O_8S$     | 1222.8 | 1222.8    |
| 119 | KB1592 | SM-EK  | 100 | 14.6 | $C_{63}H_{108}N_{17}O_{10}S$  | 1294.8 | 1294.9    |
| 120 | KB1593 | SM-SK  | 100 | 15.0 | $C_{61}H_{106}N_{17}O_9S$     | 1252.8 | 1252.6    |
| 121 | KB1594 | SM-TG  | 100 | 15.6 | $C_{58}H_{99}N_{16}O_9S$      | 1195.8 | 1195.6    |
| 122 | KB1595 | SM-IR  | 100 | 18.3 | $C_{64}H_{112}N_{19}O_8S$     | 1306.9 | 1306.8    |
| 123 | KB1596 | SM-MS  | 96  | 15.5 | $C_{60}H_{103}N_{16}O_9S_2$   | 1255.8 | 1255.6    |
| 124 | KB1597 | KI-Cap | 100 | 16.1 | $C_{44}H_{77}N_{12}O_6$       | 869.6  | 869.6     |
| 125 | KB1598 | KG-Cap | 100 | 13.5 | $C_{40}H_{69}N_{12}O_6$       | 813.5  | 813.4     |
| 126 | KB1599 | KE-Cap | 94  | 14.6 | $C_{43}H_{73}N_{12}O_8$       | 885.6  | 885.5     |

|     |        |        |     |      |                                                                  |        |        |
|-----|--------|--------|-----|------|------------------------------------------------------------------|--------|--------|
| 127 | KB1600 | KS-Cap | 100 | 13.0 | C <sub>41</sub> H <sub>71</sub> N <sub>12</sub> O <sub>7</sub>   | 843.6  | 843.5  |
| 128 | KB1601 | GT-Cap | 100 | 16.6 | C <sub>38</sub> H <sub>64</sub> N <sub>11</sub> O <sub>7</sub>   | 786.5  | 786.5  |
| 129 | KB1602 | RI-Cap | 100 | 15.9 | C <sub>44</sub> H <sub>77</sub> N <sub>14</sub> O <sub>6</sub>   | 897.6  | 897.6  |
| 130 | KB1603 | SM-Cap | 100 | 14.8 | C <sub>40</sub> H <sub>68</sub> N <sub>11</sub> O <sub>7</sub> S | 846.5  | 846.3  |
| 131 | KB1604 | KI-IR  | 100 | 18.9 | C <sub>68</sub> H <sub>121</sub> N <sub>20</sub> O <sub>7</sub>  | 1330.0 | 1329.9 |
| 132 | KB1605 | KS-IR  | 100 | 15.3 | C <sub>65</sub> H <sub>115</sub> N <sub>20</sub> O <sub>8</sub>  | 1303.9 | 1303.9 |
| 133 | KB1606 | RI-IR  | 100 | 19.6 | C <sub>68</sub> H <sub>121</sub> N <sub>22</sub> O <sub>7</sub>  | 1358.0 | 1357.7 |

## F. Table S3. Characterization of Compounds with Biotin.

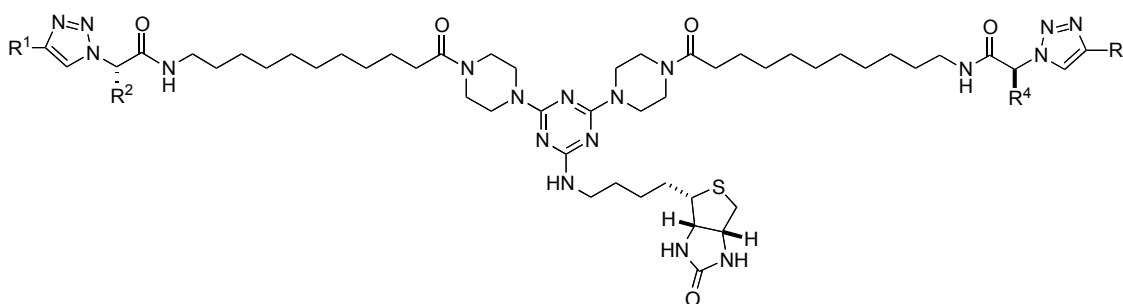

|   | compound code | TEG code | sequence (R <sup>1</sup> R <sup>2</sup> -R <sup>3</sup> R <sup>4</sup> ) | SEDEX purity (%) | retention time (min) | chemical formula                                                               | [M+H] <sup>+</sup> calculated | [M+H] <sup>+</sup> found |
|---|---------------|----------|--------------------------------------------------------------------------|------------------|----------------------|--------------------------------------------------------------------------------|-------------------------------|--------------------------|
| 1 | KB1923        | KB1468   | SK-IK                                                                    | 100              | 13.2                 | C <sub>65</sub> H <sub>115</sub> N <sub>20</sub> O <sub>6</sub> S              | 1303.9                        | 1303.6                   |
| 2 | KB1924        | KB1471   | IK-IR                                                                    | 100              | 14.8                 | C <sub>68</sub> H <sub>121</sub> N <sub>22</sub> O <sub>5</sub> S              | 1358.0                        | 1358.0                   |
| 3 | KB1925        | KB1579   | GT-EK                                                                    | 100              | 13.2                 | C <sub>61</sub> H <sub>104</sub> N <sub>19</sub> O <sub>8</sub> S              | 1262.8                        | 1262.8                   |
| 4 | KB1926        | KB1588   | RI-TG                                                                    | 100              | 14.2                 | C <sub>62</sub> H <sub>108</sub> N <sub>21</sub> O <sub>6</sub> S              | 1274.9                        | 1274.8                   |
| 5 | KB1927        | KB1591   | SM-GK                                                                    | 100              | 13.8                 | C <sub>60</sub> H <sub>104</sub> N <sub>19</sub> O <sub>6</sub> S <sub>2</sub> | 1250.7                        | 1250.7                   |
| 6 | KB1811        | KB1368   | KI-KS                                                                    | 100              | 13.1                 | C <sub>65</sub> H <sub>116</sub> N <sub>20</sub> O <sub>6</sub> S              | 1304.9                        | 1304.8                   |

## G. References

- (1) Pattarawarapan, M.; Burgess, K. *J. Med. Chem.* **2003**, *46*, 5277-5291.
- (2) Chaume, G.; Kuligowski, C.; Bezzenine-Laffolee, S.; Ricard, L.; Pancrazi, A.; Ardisson, J. *Synthesis* **2004**, 3029-3036.
- (3) Aronica, Laura A.; Terreni, S.; Caporusso, Anna M.; Salvadori, P. *Eur. J. Org. Chem.* **2001**, 2001, 4321-4329.
- (4) Tojino, M.; Uenoyama, Y.; Fukuyama, T.; Ryu, I. *Chemical Communications* **2004**, 0, 2482-2483.
- (5) Hideto Ito, T. H., Hirohisa Ohmiya and Masaya Sawamura *Beilstein J. Org. Chem.* **2011**, *7*, 951-959.

- (6) Angell, Y.; Chen, D.; Brahim, F.; Saragovi, H. U.; Burgess, K. *J. Am. Chem. Soc.* **2008**, *130*, 556-565.
- (7) Capella, L.; Montevicchi, P. C.; Nanni, D. *J. Org. Chem.* **1994**, *59*, 3368-3374.
- (8) Chen, D.; Brahim, F.; Angell, Y.; Li, Y.-C.; Moscowicz, J.; Saragovi, H. U.; Burgess, K. *ACS Chem. Biol.* **2009**, *4*, 769-781
